# Supplementary material for: Single-cell RNA sequencing unravels the transcriptional network underlying zebrafish retina regeneration
Source: eLife. 2023 Nov 21;12:RP86507. doi: 10.7554/eLife.86507 (PMC10662954; doi:10.7554/eLife.86507)
Supplement: Supplementary file 1. [file elife-86507-supp1.xlsx]

## Sheet: Cluster 1
	names	scores	logfoldchanges	pvals	pvals_adj
0	glula	202.435	5.83352	0	0
1	slc1a2b	183.241	5.14088	0	0
2	cahz	182.97	6.42422	0	0
3	selenop	180.753	5.33098	0	0
4	rlbp1a	172.976	5.28349	0	0
5	aqp1a.1	170.692	6.17169	0	0
6	nfasca	153.078	4.26958	0	0
7	cdo1	152.254	5.0861	0	0
8	gstp1	151.282	4.87755	0	0
9	fosab	149.354	5.28233	0	0
10	fxyd6l	137.299	3.6597	0	0
11	si:ch211-152c2.3	137.007	6.22127	0	0
12	ptgdsb.2	136.851	5.7235	0	0
13	jdp2b	136.284	5.2922	0	0
14	spock3	134.954	4.48385	0	0
15	sparc	132.768	4.23205	0	0
16	fosb	131.223	4.36926	0	0
17	efhd1	130.836	4.41527	0	0
18	zfp36l1b	130.494	4.80018	0	0
19	eno1a	128.921	3.30703	0	0
20	icn	127.116	4.93367	0	0
21	fosl1a	126.198	4.02405	0	0
22	mt2	125.033	5.78645	0	0
23	ppp1r14aa	123.046	4.84919	0	0
24	s100a10b	120.62	4.40558	0	0
25	rhbg	120.59	4.04734	0	0
26	atp1a1b	117.981	4.2477	0	0
27	zgc:165604	115.436	3.35964	0	0
28	pik3ip1	112.672	4.66848	0	0
29	btg2	111.39	3.15526	0	0
30	aplp2	108.683	3.53281	0	0
31	mcl1b	108.018	3.97038	0	0
32	cavin2a	105.313	4.86799	0	0
33	apoeb	104.883	4.02795	0	0
34	prdx6	103.333	3.42915	0	0
35	jun	101.642	3.01329	0	0
36	socs3a	101.591	4.51218	0	0
37	mcl1a	101.506	3.70119	0	0
38	col15a1b	100.48	5.35317	0	0
39	si:dkey-16p21.8	99.5826	3.89637	0	0
40	mCherry	96.9463	3.51469	0	0
41	slc38a4	95.862	4.35703	0	0
42	junba	95.8325	3.06476	0	0
43	insig1	95.0945	3.54694	0	0
44	ubb	94.8286	3.61183	0	0
45	dap1b	94.216	3.26635	0	0
46	atp1b4	94.208	6.21407	0	0
47	dab2ipa	93.9727	3.3033	0	0
48	atp1b3a	93.8108	3.83169	0	0
49	hsp70l	93.318	5.3577	0	0
50	epas1b	92.8662	4.17762	0	0
51	hsp70.2	92.451	5.2196	0	0
52	junbb	92.0571	3.12044	0	0
53	hsp70.3	90.2975	5.16995	0	0
54	mycb	89.9035	3.78174	0	0
55	pfkfb3	89.8288	4.42964	0	0
56	jund	89.8059	3.04676	0	0
57	gulp1a	88.9216	4.50795	0	0
58	dhrs13l1	87.8229	4.12503	0	0
59	tob1b	87.5904	3.63673	0	0
60	gpm6bb	87.5259	4.23235	0	0
61	glulb	86.9347	2.94231	0	0
62	nrgna	86.5343	3.37761	0	0
63	hsp90aa1.2	85.8828	4.62114	0	0
64	itm2ba	85.2251	1.97431	0	0
65	hyal6	84.9139	4.75174	0	0
66	CU929418.2	84.8507	3.71853	0	0
67	tob1a	83.8731	3.63775	0	0
68	si:dkey-56f14.7	82.7586	3.83697	0	0
69	lin7a	82.7543	4.84459	0	0
70	gyg1b	82.6634	4.99462	0	0
71	f3b	82.6031	3.78448	0	0
72	csrp2	82.1259	4.8698	0	0
73	gpd1b	81.334	5.08928	0	0
74	zgc:153704	80.9991	5.60882	0	0
75	vat1	80.4988	2.9803	0	0
76	gadd45ba	80.3583	2.95222	0	0
77	gapdhs	79.8132	1.7402	0	0
78	tmem176l.1	78.8969	2.26358	0	0
79	zgc:92606	78.5996	2.63212	0	0
80	rtn4a	78.4593	1.95109	0	0
81	cnn3a	78.3557	2.7454	0	0
82	ppp1r15a	77.7693	3.81207	0	0
83	gpm6ab	77.76	2.38799	0	0
84	zgc:195173	77.6779	4.04175	0	0
85	scarb2a	77.5493	2.74727	0	0
86	espn	77.1213	4.10165	0	0
87	alkbh3-1	76.7421	3.68896	0	0
88	hsd11b2	76.6223	4.31073	0	0
89	CR383676.1	76.359	1.11812	0	0
90	anks4b	75.9362	4.86805	0	0
91	si:ch1073-303k11.2	75.8584	3.03664	0	0
92	dnajb1b	75.4512	4.25001	0	0
93	clstn1	75.3248	2.61564	0	0
94	cebpd	74.9484	4.39271	0	0
95	map4l	74.8861	3.42349	0	0
96	hmgcs1	74.8677	4.08098	0	0
97	hsp70.1	74.6769	4.99632	0	0
98	slc43a2b	74.324	4.36346	0	0
99	acbd7	73.9759	2.28859	0	0

## Sheet: Cluster 2
	names	scores	logfoldchanges	pvals	pvals_adj
0	apoeb	106.334	4.60501	0	0
1	fosab	68.4878	3.7103	2.59333e-284	1.99478e-281
2	glula	62.3884	3.50148	1.17418e-248	6.37533e-246
3	rlbp1a	62.3805	3.27173	1.06949e-235	4.62739e-233
4	fosb	53.3453	3.0752	1.58897e-192	3.96397e-190
5	nfasca	52.183	2.64124	7.81865e-192	1.91598e-189
6	slc1a2b	51.1151	2.60675	2.87856e-196	7.51984e-194
7	sparc	50.2436	2.87039	3.39718e-180	6.96825e-178
8	cahz	48.2816	2.8654	4.96698e-190	1.1857e-187
9	mt2	46.5442	4.2352	1.68863e-162	2.78332e-160
10	jdp2b	44.7495	3.26823	5.8266e-164	9.83808e-162
11	btg2	41.3894	2.18796	1.4863e-156	2.13249e-154
12	chrdl2	41.0565	5.58874	6.67257e-135	6.11821e-133
13	rdh10a	40.6915	5.24996	4.75492e-134	4.26112e-132
14	jun	40.1058	2.23006	2.28445e-149	2.70336e-147
15	zfp36l1b	39.3362	2.82158	2.07407e-138	2.0223e-136
16	selenop	38.5966	2.61079	1.43085e-141	1.48396e-139
17	sncga	38.213	3.16144	5.70028e-130	4.81239e-128
18	atp1a1b	36.8106	2.3494	7.88695e-132	6.86785e-130
19	gstp1	34.9228	2.29147	5.41067e-127	4.36813e-125
20	fxyd6l	34.064	1.88243	9.06714e-124	6.9744e-122
21	atp1b3a	34.0034	2.60007	2.14143e-116	1.47876e-114
22	aldh1a3	33.464	4.51142	9.04807e-111	5.86768e-109
23	ptgdsb.2	32.2485	2.58856	3.09976e-114	2.09355e-112
24	cdo1	31.2202	2.19925	3.36632e-109	2.11376e-107
25	zgc:195173	29.736	2.71352	1.15191e-100	6.47009e-99
26	nrgna	28.8885	2.12921	5.07975e-98	2.76352e-96
27	aplp2	28.6165	1.90004	5.3557e-98	2.90793e-96
28	jund	28.4384	1.99054	9.786e-97	5.21123e-95
29	CU467822.1	28.1653	1.87734	2.17112e-95	1.13435e-93
30	tob1a	28.0433	2.44777	2.0605e-93	1.0374e-91
31	stc2a	27.9229	3.92417	1.04442e-91	5.10071e-90
32	zgc:153704	27.907	2.9477	1.79344e-93	9.04591e-92
33	si:dkey-164f24.2	27.8178	3.1058	2.95757e-91	1.43429e-89
34	f3b	27.6234	2.78238	3.66227e-92	1.79809e-90
35	eno1a	27.3684	1.49416	6.31799e-96	3.33877e-94
36	ppp1r14aa	27.2941	2.18303	1.31927e-91	6.43166e-90
37	si:ch211-152c2.3	27.2213	2.45771	1.01972e-92	5.06948e-91
38	junbb	27.0992	2.11526	5.76491e-91	2.76666e-89
39	socs3a	27.0586	2.82674	5.77902e-90	2.71692e-88
40	hspb1	26.3107	3.33592	2.9242e-86	1.30603e-84
41	s100a10b	25.6166	1.92273	2.63208e-86	1.17746e-84
42	mcl1a	25.4403	2.15674	1.41232e-84	6.06334e-83
43	efhd1	25.0204	1.88129	7.03922e-83	2.96686e-81
44	junba	24.9867	1.9589	1.17807e-82	4.93525e-81
45	egr1	24.3192	2.77173	6.89342e-78	2.69613e-76
46	clstn1	23.9734	1.83134	2.57778e-77	1.00537e-75
47	mstnb	23.9524	4.54377	2.2309e-75	8.39346e-74
48	fosl1a	23.7623	2.22706	6.55343e-77	2.54161e-75
49	slc38a4	23.5991	2.1577	1.06053e-75	4.0174e-74
50	epas1b	23.5698	2.19522	1.75408e-75	6.60847e-74
51	sik2b	22.8204	2.19927	3.89487e-72	1.39706e-70
52	si:dkey-16p21.8	22.3226	1.94325	1.29721e-70	4.47893e-69
53	rsrp1	21.9577	1.67683	4.46155e-69	1.48849e-67
54	ptmaa	21.8119	1.29266	9.5485e-70	3.22842e-68
55	pik3ip1	21.6511	1.89411	2.75519e-68	9.0826e-67
56	cavin2a	21.4658	2.04747	6.23956e-67	1.99514e-65
57	prdx6	21.3528	1.57737	3.0938e-67	9.9501e-66
58	dab2ipa	21.3	1.7027	1.7757e-66	5.63885e-65
59	mcl1b	21.2348	1.91808	3.29435e-66	1.039e-64
60	gyg1b	21.2175	2.12543	8.7048e-66	2.72059e-64
61	gulp1a	20.9188	2.07952	1.93905e-64	5.90048e-63
62	bgnb	20.6105	2.36639	8.28246e-63	2.44249e-61
63	rbpms2b	20.4674	1.68067	5.11193e-63	1.51233e-61
64	dhrs13l1	19.997	1.88386	1.15255e-60	3.29024e-59
65	insig1	19.9105	1.67785	4.60895e-61	1.32668e-59
66	pfkfb3	19.6554	2.19985	4.3419e-59	1.20714e-57
67	slc4a4a	19.382	2.02141	7.16841e-58	1.94799e-56
68	dusp2	19.2915	2.53009	2.47299e-57	6.64851e-56
69	mCherry	19.2542	1.68743	4.86951e-58	1.32588e-56
70	hopx	19.2479	2.06763	2.24087e-57	6.03619e-56
71	btg1	18.9942	1.18844	7.22837e-57	1.91725e-55
72	spock3	18.865	1.4088	3.17879e-57	8.52119e-56
73	cebpd	18.6546	2.18601	6.71514e-55	1.72335e-53
74	mycb	18.3847	2.02951	6.11727e-54	1.54415e-52
75	tob1b	18.1417	1.81266	5.45692e-53	1.35159e-51
76	col15a1b	18.0674	1.74489	7.38042e-53	1.82312e-51
77	gpd1b	17.8062	1.97615	2.00688e-51	4.80732e-50
78	slc43a2b	17.6048	2.0678	2.02626e-50	4.73097e-49
79	ndrg3a	17.5949	2.00705	2.40195e-50	5.59868e-49
80	ivns1abpa	17.3595	1.5652	1.41038e-49	3.23838e-48
81	alkbh3-1	17.2597	1.81865	2.54943e-49	5.81517e-48
82	CU929418.2	17.2207	1.72715	5.20281e-49	1.18091e-47
83	espn	17.0136	1.80471	3.76099e-48	8.37184e-47
84	itm2ba	16.9251	1.0588	3.636e-48	8.10665e-47
85	map4l	16.7713	1.68195	3.56967e-47	7.72247e-46
86	cav1	16.6492	2.3276	2.45416e-46	5.22352e-45
87	csrp2	16.6229	1.98047	2.08606e-46	4.45375e-45
88	rhbg	16.4121	1.40557	4.45368e-46	9.41425e-45
89	gnai2b	16.3878	2.70753	3.58297e-45	7.40971e-44
90	dap1b	16.1826	1.35549	5.08834e-45	1.04604e-43
91	hsp90aa1.2	16.1212	2.2289	1.04464e-44	2.13326e-43
92	pim1	16.0902	1.19142	5.05171e-45	1.03928e-43
93	nocta	15.9708	1.43132	4.53006e-44	9.09658e-43
94	tmem176l.1	15.7742	1.0267	1.40745e-43	2.78981e-42
95	im:7152348	15.7223	2.02036	1.22048e-42	2.36338e-41
96	rtn4a	15.6939	0.85289	1.13528e-43	2.25841e-42
97	vegfaa	15.5268	1.8014	6.70576e-42	1.26233e-40
98	mdka	15.521	0.896474	4.27714e-43	8.40585e-42
99	rpz5	15.3304	1.89744	3.61681e-41	6.64145e-40

## Sheet: Cluster 3
	names	scores	logfoldchanges	pvals	pvals_adj
0	her15.1-1	58.0274	4.22501	0	0
1	si:ch73-335l21.4	57.0591	3.12282	0	0
2	cxcl18b	52.7547	4.97798	6.45888e-285	2.98088e-281
3	marcksl1b	52.35	2.36035	0	8.15133e-306
4	mmp9	50.8067	4.91366	4.25408e-273	1.178e-269
5	stm	48.4741	8.31215	2.71225e-255	5.36464e-252
6	cdh2	45.7198	1.95709	2.53351e-256	5.39658e-253
7	rplp1	45.0566	1.4268	1.04287e-279	3.20867e-276
8	sox4a-1	44.0414	3.71154	2.55414e-233	3.21485e-230
9	txn	43.9009	3.34604	1.29294e-235	1.70489e-232
10	her9	43.6844	3.63708	1.94456e-232	2.24361e-229
11	si:dkey-151g10.6	42.1423	1.3816	8.20858e-247	1.33708e-243
12	fosab	41.7162	2.00326	2.24121e-282	7.75767e-279
13	si:ch211-222l21.1	41.4297	1.93232	3.68901e-243	5.67513e-240
14	rplp2l	41.2953	1.51043	7.70036e-243	1.12227e-239
15	pim1	41.1397	1.88224	4.57731e-237	6.33751e-234
16	ncl	41.0663	2.0768	1.0792e-220	8.78941e-218
17	id1	39.849	2.90209	1.27861e-213	8.85151e-211
18	rps11	39.7235	1.30806	5.48318e-228	5.8398e-225
19	hspa5	39.5826	2.04427	4.20905e-221	3.5319e-218
20	hbegfa	39.3959	3.19938	8.13639e-205	4.79372e-202
21	rpl27	39.3708	1.39063	2.84436e-222	2.46135e-219
22	rtn4a	39.2934	1.44898	5.87293e-224	5.42091e-221
23	rps14	39.2682	1.29278	2.24736e-225	2.22256e-222
24	six3b	38.6243	1.99469	1.56424e-209	9.84437e-207
25	rps8a	38.4972	1.23865	2.79854e-224	2.67222e-221
26	rpl23	38.4253	1.28829	2.44073e-220	1.93104e-217
27	rpl9	38.1932	1.35327	7.28776e-217	5.6057e-214
28	rps27a	37.9284	1.25083	4.7993e-215	3.59182e-212
29	rps25	37.8854	1.38726	1.00055e-211	6.59669e-209
30	rps15a	37.8685	1.30877	8.98067e-213	6.06545e-210
31	rps23	37.859	1.28788	2.61105e-214	1.9027e-211
32	rplp0	37.4114	1.22599	2.99561e-214	2.12696e-211
33	rps26l	37.0945	1.37055	8.68268e-204	5.009e-201
34	her15.1	36.9349	3.66686	1.74134e-186	6.79148e-184
35	rpl36a	36.7668	1.34104	1.73275e-201	9.40816e-199
36	foxj1a	36.7667	3.51309	1.45086e-185	5.35679e-183
37	uba52	36.4925	1.22525	2.31388e-200	1.23219e-197
38	tomm20a	36.4276	2.38107	2.43812e-185	8.76803e-183
39	zgc:158343	36.3221	2.79957	6.69102e-188	2.80729e-185
40	rps2	36.2913	1.17684	9.88204e-207	6.08097e-204
41	her12	36.1483	4.5609	3.04185e-180	9.68182e-178
42	rps15	35.9535	1.2252	1.50941e-197	7.88622e-195
43	hsp90aa1.2	35.6636	2.1083	2.29008e-205	1.37858e-202
44	myl6	35.6356	2.19896	3.57794e-182	1.22317e-179
45	rps24	35.5618	1.20432	1.34918e-194	6.67144e-192
46	her4.2	35.5531	3.94767	4.00641e-177	1.21914e-174
47	rpl35	35.5257	1.26911	8.30963e-191	3.65241e-188
48	eef2b	35.2444	1.25235	1.69168e-187	6.99167e-185
49	rps19	35.1813	1.19642	5.4359e-194	2.6408e-191
50	rpl17	35.0804	1.16933	1.21297e-193	5.79112e-191
51	rpl32	35.0037	1.21283	4.25489e-191	1.93151e-188
52	her6	34.6755	2.6412	3.08212e-176	9.07946e-174
53	mych	34.6143	2.115	1.11191e-177	3.42109e-175
54	rps10	34.5897	1.12996	3.25167e-191	1.5007e-188
55	cd63	34.5883	2.14532	2.03125e-173	5.25675e-171
56	TXN	34.5595	1.49987	5.43449e-178	1.69086e-175
57	rpl28	34.5156	1.16959	3.79543e-187	1.50142e-184
58	rps13	34.3977	1.18578	8.66921e-186	3.24404e-183
59	rps7	34.3739	1.12949	6.0668e-189	2.58455e-186
60	rpsa	34.216	1.14677	2.63893e-186	1.01492e-183
61	rpl19	34.157	1.12746	1.82053e-187	7.41356e-185
62	sgk1	34.148	2.01231	6.07867e-175	1.70025e-172
63	rpl7	34.1246	1.14912	9.00281e-185	3.19611e-182
64	rps5	34.0773	1.13528	3.78162e-187	1.50142e-184
65	RPS17	34.0686	1.17318	5.9315e-181	1.95535e-178
66	her4.1	34.0387	4.4916	2.1703e-166	4.69515e-164
67	rps9	33.9789	1.10568	5.09902e-186	1.93421e-183
68	rpl14	33.9532	1.16578	3.29701e-179	1.03747e-176
69	rpl36	33.7573	1.33293	6.21448e-175	1.72085e-172
70	atp1b1a	33.7249	1.96387	5.48226e-171	1.32008e-168
71	rps12	33.7248	1.1742	5.50733e-182	1.8598e-179
72	rpl18a	33.6527	1.16294	2.60724e-180	8.39502e-178
73	krt8	33.5853	2.35387	2.05935e-168	4.59883e-166
74	rpl23a	33.4905	1.20875	1.73348e-176	5.16148e-174
75	ier2b	33.4694	2.47319	2.50291e-166	5.3314e-164
76	hsp70.3	33.4288	2.13517	7.76503e-181	2.52967e-178
77	cirbpa	33.3763	1.24393	3.22153e-175	9.10281e-173
78	si:dkey-7j14.6	33.3128	1.47718	1.71546e-171	4.20379e-169
79	rpl35a	33.1879	1.18986	3.80403e-174	1.00321e-171
80	nme2b.1	33.1549	1.20378	6.09036e-174	1.59102e-171
81	RPL37A	33.1386	1.19828	5.63692e-173	1.41902e-170
82	rpl13	33.0922	1.10685	6.75894e-177	2.03437e-174
83	hsp90ab1	33.0058	0.964442	8.40456e-171	1.98915e-168
84	crlf1a	32.9955	2.78609	3.80611e-163	7.80703e-161
85	eef1a1l1	32.975	0.900469	3.58648e-173	9.19566e-171
86	tubb4b	32.9036	1.166	5.30172e-169	1.19358e-166
87	rpl10	32.8689	1.09459	2.87265e-175	8.20068e-173
88	rpl31	32.8521	1.15677	7.72289e-171	1.84357e-168
89	rpl13a	32.7329	1.07202	5.63924e-172	1.39425e-169
90	rpl39	32.7138	1.11895	3.51915e-171	8.54813e-169
91	rps3a	32.6093	1.06631	1.66514e-174	4.47665e-172
92	rpl7a	32.461	1.09104	6.19848e-173	1.54633e-170
93	her4.2-1	32.3413	4.64543	2.05149e-154	3.86447e-152
94	vmp1	32.2893	2.58438	1.0513e-157	2.06466e-155
95	rpl21	32.2276	1.11983	5.26632e-169	1.19358e-166
96	rpl10a	32.224	1.05858	1.86218e-170	4.33324e-168
97	ppdpfb	32.209	1.18538	1.54238e-166	3.363e-164
98	rps4x	32.0587	1.09557	3.87937e-169	8.87798e-167
99	rpl15	31.7955	1.0869	2.19158e-168	4.85496e-166

## Sheet: Cluster 4
	names	scores	logfoldchanges	pvals	pvals_adj
0	f3a	55.3621	3.08453	4.78855e-282	6.02726e-279
1	crlf1a	48.0078	4.0676	2.27174e-230	1.90627e-227
2	fabp7a	45.2971	1.88697	2.87139e-248	2.65039e-245
3	mdka	43.4432	1.95893	1.59665e-225	1.30038e-222
4	vmp1	42.7947	2.97081	5.26691e-208	3.47252e-205
5	marcksl1a	42.7519	2.05885	9.05181e-211	6.26634e-208
6	crabp1a	36.2182	1.70072	5.34104e-175	2.46498e-172
7	clcf1	35.6869	3.76531	1.51566e-161	5.31269e-159
8	myl6	35.6744	2.2761	4.50207e-166	1.68469e-163
9	txn	33.9454	3.09708	1.88915e-153	6.08286e-151
10	hbegfa	33.5346	3.05527	6.53116e-151	2.03207e-148
11	cdh2	31.5185	1.47304	4.69263e-144	1.26159e-141
12	zic2b	31.5067	3.06536	1.68269e-138	4.19779e-136
13	akap12b	31.3218	2.7622	1.53375e-137	3.75851e-135
14	ppdpfb	30.0807	1.1605	2.6775e-139	6.80209e-137
15	flna	29.9791	2.37691	2.39459e-130	5.22115e-128
16	cd82a	29.0543	1.8533	3.05954e-126	6.13925e-124
17	six3b	29.0384	1.83422	1.51926e-127	3.13953e-125
18	dusp5	28.4958	2.87673	6.5862e-121	1.21586e-118
19	cnn2	28.3977	2.20565	6.45351e-122	1.23244e-119
20	acbd7	28.1484	1.5916	6.28876e-123	1.20932e-120
21	rpl12	27.1359	0.97616	4.36725e-121	8.11635e-119
22	gfap	26.4764	1.71114	4.28123e-111	6.8133e-109
23	si:ch211-251b21.1	26.1544	3.09538	1.21199e-106	1.79472e-104
24	CR383676.1	26.1527	0.72878	1.65166e-112	2.72238e-110
25	marcksl1b	26.1388	1.29031	1.60024e-112	2.65343e-110
26	rpl9	25.5574	1.02616	6.81856e-110	1.06674e-107
27	si:dkey-238o13.4	24.8564	2.6693	1.03554e-99	1.36549e-97
28	lepb	24.8193	3.22826	7.70522e-99	1.00644e-96
29	ckbb	24.4378	1.22457	2.04044e-100	2.72955e-98
30	bzw1b	24.0334	1.35201	1.85015e-97	2.35011e-95
31	tgif1	23.7229	1.64994	8.8249e-94	1.01398e-91
32	mvp	23.7193	1.6159	3.56846e-94	4.13448e-92
33	rasgef1bb	23.5234	1.74011	1.99164e-92	2.17986e-90
34	nme2b.1	23.2594	0.99787	1.49996e-93	1.69533e-91
35	rps2	22.9865	0.882616	1.06156e-93	1.2097e-91
36	col18a1a	22.7801	2.00125	1.45429e-87	1.44859e-85
37	elovl1b	22.6262	2.45564	2.50989e-86	2.43864e-84
38	rplp0	22.1106	0.830476	3.82144e-88	3.86203e-86
39	zgc:165604	21.6001	1.37193	1.67833e-82	1.50404e-80
40	mdkb	21.3778	1.69612	5.39342e-80	4.66716e-78
41	tjp2b	21.3483	2.2581	4.89275e-79	4.10561e-77
42	cd81a	20.9386	1.19473	9.01077e-78	7.31722e-76
43	atp1b1a	20.6884	1.64429	7.48029e-76	5.85132e-74
44	krt8	20.5486	1.7693	3.37734e-75	2.57636e-73
45	sgk1	20.4472	1.40394	2.51544e-75	1.92951e-73
46	si:dkey-7j14.6	20.4342	1.04556	8.55792e-76	6.67542e-74
47	myl9b	19.5733	1.28505	5.23127e-70	3.53315e-68
48	rpl19	19.4724	0.725688	1.03989e-71	7.27159e-70
49	rpl7a	19.4067	0.7198	2.42591e-71	1.6794e-69
50	si:ch1073-303k11.2	19.3622	1.23088	1.51386e-69	1.0077e-67
51	sall1b	19.3119	3.52689	4.2988e-67	2.69927e-65
52	rplp1	19.2226	0.731488	4.52605e-70	3.06433e-68
53	mmp9	19.2013	2.3623	4.20167e-67	2.64429e-65
54	rtn4a	19.0522	0.876077	3.92554e-68	2.53385e-66
55	c7b	18.7774	2.77231	2.14362e-64	1.29323e-62
56	fam129bb	18.7764	2.28985	1.91088e-64	1.15533e-62
57	nrp2b	18.6152	1.96011	1.01051e-63	5.96633e-62
58	pim1	18.6089	0.977517	6.04863e-66	3.73867e-64
59	tpt1	18.462	0.72684	1.3528e-64	8.197e-63
60	gpm6aa	18.2658	0.829823	2.69583e-63	1.5749e-61
61	rps9	18.142	0.69292	1.85218e-63	1.08663e-61
62	aplp1	18.0937	1.95405	7.7734e-61	4.24563e-59
63	igfbp5b	18.025	2.39452	2.5769e-60	1.36962e-58
64	yap1	17.9879	1.52097	1.63153e-60	8.77256e-59
65	zgc:86709	17.9563	3.52238	1.01688e-59	5.28302e-58
66	rpl32	17.8721	0.675937	6.01506e-62	3.39925e-60
67	pros1	17.8544	1.84541	1.61868e-59	8.34692e-58
68	zgc:153867	17.8443	0.912853	2.90741e-60	1.53643e-58
69	rps14	17.8069	0.660975	1.86831e-61	1.03886e-59
70	rps3a	17.7434	0.66545	3.2671e-61	1.79503e-59
71	grb10b	17.7064	1.50598	6.39577e-59	3.23185e-57
72	myl12.1	17.6667	0.779661	1.73359e-59	8.92282e-58
73	il11b	17.6421	4.81023	6.45538e-58	3.18638e-56
74	lgals2a	17.6328	2.19026	2.21073e-58	1.10103e-56
75	pprc1	17.5055	1.91052	1.076e-57	5.28288e-56
76	rack1	17.4948	0.660356	7.31704e-60	3.81575e-58
77	irf2	17.4868	2.83746	2.75036e-57	1.33849e-55
78	tpm4a	17.3001	2.23798	1.80814e-56	8.61777e-55
79	eef1g	17.2335	0.694715	2.84274e-58	1.41326e-56
80	cnn3a	17.0676	1.18898	6.56572e-56	3.07633e-54
81	rps11	17.0342	0.66361	9.59311e-57	4.62792e-55
82	rpl11	17.0085	0.683453	1.02125e-56	4.91816e-55
83	rps10	16.9364	0.657839	1.82651e-56	8.69037e-55
84	rpl36a	16.5312	0.678872	7.1508e-54	3.17328e-52
85	rpl23	16.4911	0.650539	7.07473e-54	3.14457e-52
86	rps8a	16.485	0.622688	4.61522e-54	2.06462e-52
87	fabp3	16.457	0.908652	5.85555e-53	2.55348e-51
88	si:dkey-79d12.5	16.395	1.80493	9.3767e-52	3.9104e-50
89	mych	16.3943	1.19872	2.17796e-52	9.27843e-51
90	klf7b	16.3875	1.33681	5.60049e-52	2.35689e-50
91	actb1	16.3788	0.509623	3.39098e-53	1.48811e-51
92	nat8l	16.3308	1.99587	2.45106e-51	1.01151e-49
93	fosl2	16.275	1.07539	1.59466e-51	6.60057e-50
94	npdc1b	16.2726	2.00256	4.73533e-51	1.93116e-49
95	rps15a	16.173	0.677109	7.8602e-52	3.28787e-50
96	kitlgb	16.0279	3.64021	1.57451e-49	6.14083e-48
97	dbn1	15.9858	1.42546	1.0771e-49	4.21866e-48
98	rps12	15.9854	0.65464	5.06723e-51	2.06348e-49
99	rpl8	15.9623	0.584302	4.55638e-51	1.86093e-49

## Sheet: Cluster 5
	names	scores	logfoldchanges	pvals	pvals_adj
0	hmgn2	68.3923	2.72956	0	0
1	hmgb2b	63.28	2.25369	0	0
2	rpl9	61.1325	1.68343	0	0
3	rpl12	60.2163	1.50301	0	0
4	rplp0	59.622	1.53967	0	0
5	rplp1	59.1498	1.4712	0	0
6	rps2	56.1216	1.46938	0	0
7	h2afvb	55.0496	1.87337	0	0
8	rps9	54.2364	1.38154	0	0
9	rplp2l	54.0467	1.5052	0	0
10	rps12	53.8808	1.40589	0	0
11	rps3a	53.5962	1.37235	0	0
12	rpl23	53.5159	1.38393	0	0
13	rpl10a	53.3765	1.36333	0	0
14	rps10	52.5771	1.35702	0	0
15	rpl7a	52.3594	1.3694	0	0
16	rpl11	52.0896	1.36391	0	0
17	rpl3	51.9273	1.342	0	0
18	rps8a	51.7904	1.36358	0	0
19	rpl32	51.49	1.33726	0	0
20	si:dkey-151g10.6	51.3148	1.31082	0	0
21	rpl15	51.1711	1.40965	0	0
22	rpsa	50.9329	1.36724	0	0
23	rpl10	50.8832	1.30216	0	0
24	hmgb2a	50.7103	2.16622	0	0
25	rpl21	50.6806	1.33996	0	0
26	rps7	50.568	1.31106	0	0
27	rps19	50.2781	1.33427	0	0
28	ran	49.9998	1.58514	0	0
29	rpl8	49.8036	1.28637	0	0
30	eef1g	49.5404	1.36753	0	0
31	si:ch211-222l21.1	49.4815	2.15171	0	0
32	rps14	49.4759	1.26607	0	0
33	rps6	49.3549	1.38638	0	0
34	rps5	49.3528	1.32128	0	0
35	rps15a	49.2863	1.34652	0	0
36	rps24	49.2785	1.26134	0	0
37	rpl19	49.2107	1.31627	0	0
38	rpl13	49.0495	1.29848	0	0
39	rps23	48.87	1.29315	0	0
40	rpl18a	48.8542	1.3005	0	0
41	rps4x	48.7471	1.31525	0	0
42	rps27a	48.6254	1.287	0	0
43	rpl17	48.2268	1.26387	0	0
44	rps16	48.2198	1.25593	0	0
45	rps11	48.0729	1.25917	0	0
46	rpl28	48.0076	1.24278	0	0
47	rps13	47.7594	1.28399	0	0
48	nme2b.1	47.6809	1.42599	0	0
49	rpl18	47.597	1.26247	0	0
50	rpl13a	47.4878	1.2015	0	0
51	rps25	47.3997	1.32961	0	0
52	rps3	47.3377	1.29544	0	0
53	rps27.1	47.1449	1.24756	0	0
54	rpl7	47.1441	1.27964	0	0
55	eef1b2	47.0653	1.36162	0	0
56	rack1	47.0208	1.27411	0	0
57	fabp3	46.9506	1.62802	0	0
58	tpt1	46.9379	1.25231	0	0
59	eef1a1l1	46.3877	1.03474	0	0
60	rps15	46.0095	1.24422	0	0
61	rpl5a	45.8833	1.39266	0	0
62	eef2b	45.7804	1.25583	0	0
63	si:ch211-288g17.3	45.4481	1.84983	0	0
64	rpl36a	45.2594	1.28327	0	0
65	hmgb1b	45.2567	1.61473	0	0
66	rpl27	45.0174	1.24903	0	0
67	rpl23a	44.9115	1.27743	0	0
68	rpl24	44.5558	1.19912	0	0
69	rpl35	44.4294	1.21239	0	0
70	crabp1a	44.3036	1.68511	2.62925e-299	3.77236e-297
71	cirbpa	44.0698	1.35493	0	9.78133e-307
72	rpl35a	43.6378	1.23835	0	6.42313e-308
73	rpl39	43.4533	1.18711	0	5.72968e-307
74	hmga1a	43.0414	1.82881	2.99391e-290	4.06394e-288
75	ppiaa	42.9143	1.28834	1.27576e-298	1.82098e-296
76	RPS17	42.7547	1.16395	3.72847e-301	5.4627e-299
77	faua	42.6374	1.16585	2.29384e-307	3.49004e-305
78	uba52	42.3369	1.11147	5.5288e-300	7.97386e-298
79	fabp7a	42.3054	1.59858	2.38834e-293	3.35714e-291
80	rpl30	41.6456	1.15892	4.22835e-289	5.68384e-287
81	rpl34	41.4535	1.14929	4.54352e-286	6.04878e-284
82	rpl31	41.2437	1.10678	2.00079e-286	2.67651e-284
83	serbp1a	41.2232	1.21775	6.65797e-275	8.49612e-273
84	RPL37A	40.6989	1.17243	1.35321e-276	1.74287e-274
85	pcna	40.532	2.51995	1.74072e-254	2.00843e-252
86	cirbpb	40.4227	1.05665	1.03576e-272	1.29779e-270
87	rps26l	40.2267	1.20853	4.48589e-272	5.59544e-270
88	h3f3b.1	40.208	1.70669	1.77629e-266	2.17643e-264
89	seta	40.1858	1.59228	4.83215e-257	5.69391e-255
90	si:dkey-238o13.4	40.0403	3.34941	7.22127e-241	7.75055e-239
91	snrpd1	40.0133	1.5824	1.95191e-257	2.30984e-255
92	naca	39.9283	1.1374	5.06597e-267	6.23474e-265
93	snrpb	39.5479	1.48821	5.7144e-254	6.56587e-252
94	rpl4	39.3372	1.2947	1.43986e-257	1.71121e-255
95	rpl22l1	39.032	1.24107	1.17535e-255	1.3675e-253
96	rps17	38.826	1.2537	6.69516e-254	7.66098e-252
97	rpl37-1	38.6438	1.18898	1.51848e-252	1.73038e-250
98	hnrnpabb	38.4585	1.34495	1.04898e-244	1.15267e-242
99	marcksb	38.3316	1.56865	5.8672e-241	6.32174e-239

## Sheet: Cluster 6
	names	scores	logfoldchanges	pvals	pvals_adj
0	hmgb2a	87.258	3.04754	0	0
1	hmgn2	84.3582	3.12872	0	0
2	si:ch211-222l21.1	74.9759	2.75253	0	0
3	h3f3b.1	71.5982	2.71113	0	0
4	hmgb2b	68.3135	2.52365	0	0
5	hmga1a	67.3632	2.50176	0	0
6	tubb2b	66.2198	2.7264	0	0
7	h2afvb	55.4969	2.11894	0	0
8	mki67	51.9414	3.30911	1.87258e-281	3.30278e-279
9	si:ch73-281n10.2	50.2393	2.13049	1.91644e-292	3.51445e-290
10	stmn1a	49.7376	2.93429	1.67162e-272	2.87508e-270
11	si:ch211-288g17.3	47.2804	2.09487	6.48152e-269	1.0812e-266
12	tuba8l4	46.3416	1.94042	8.84027e-262	1.41501e-259
13	seta	45.1819	1.87934	5.01732e-250	7.55079e-248
14	dek	45.1686	2.62358	1.04521e-240	1.4919e-238
15	hmgb1b	42.7413	1.74109	8.63687e-236	1.2079e-233
16	cirbpa	42.6862	1.44079	2.74308e-244	3.95617e-242
17	ran	42.3483	1.5821	3.58725e-236	5.06809e-234
18	hmgb1a	41.8001	1.64062	1.1492e-225	1.51536e-223
19	ptmab	40.8636	1.43027	1.05799e-228	1.42911e-226
20	cbx3a	40.4069	1.95265	1.25405e-212	1.56423e-210
21	snrpd1	39.9812	1.81625	1.78427e-212	2.20573e-210
22	hnrnpaba	39.2857	1.37229	4.48024e-211	5.46531e-209
23	lbr	38.7222	2.61117	1.98339e-196	2.23261e-194
24	cirbpb	36.5193	1.11699	4.8176e-196	5.40098e-194
25	hnrnpabb	36.4471	1.46535	1.95901e-190	2.08643e-188
26	hnrnpa0l-1	36.4218	1.23699	2.01019e-191	2.15753e-189
27	rpsa	35.4044	1.16869	8.47709e-192	9.1695e-190
28	rplp0	35.3771	1.17237	2.2797e-192	2.47557e-190
29	rplp1	35.3327	1.132	2.46201e-194	2.71616e-192
30	tubb4b	34.7375	1.30823	4.71917e-176	4.53745e-174
31	snrpb	34.6499	1.57053	1.40941e-175	1.34116e-173
32	stmn1b	34.0937	1.79896	6.65592e-175	6.29041e-173
33	syncrip	34.0644	1.40168	1.6136e-171	1.46981e-169
34	calm2b	33.8959	1.53569	2.20606e-170	2.00288e-168
35	tuba1a	33.8205	1.87516	1.53521e-167	1.37578e-165
36	rps8a	33.5567	1.09473	5.12273e-179	5.12106e-177
37	rpl12	33.5126	1.08475	6.63766e-177	6.51786e-175
38	rpl9	33.3637	1.24193	1.02137e-172	9.42763e-171
39	anp32a	33.2919	1.73392	1.19158e-162	1.02472e-160
40	rps2	33.209	1.1056	4.20745e-176	4.07372e-174
41	top2a	33.0755	3.05652	2.30374e-157	1.88737e-155
42	ccna2	33.0162	2.93569	7.21474e-157	5.84162e-155
43	rps10	32.8897	1.07667	1.87297e-173	1.75218e-171
44	chd7	32.5199	2.04876	1.56904e-155	1.23433e-153
45	rps3a	32.4985	1.08883	8.44867e-169	7.62059e-167
46	eef1g	32.0494	1.13515	5.57216e-166	4.94547e-164
47	marcksb	31.9269	1.57704	5.8187e-156	4.63004e-154
48	rps9	31.852	1.05901	2.12296e-164	1.85448e-162
49	rpl21	31.6763	1.06377	2.10065e-162	1.8009e-160
50	rps27.1	31.6646	1.06888	4.81414e-162	4.08922e-160
51	ddx39ab	31.6353	1.54253	2.9046e-153	2.22802e-151
52	rps5	31.5539	1.08402	5.06445e-162	4.28868e-160
53	cenpf	31.5482	3.22476	7.3012e-147	5.11842e-145
54	tuba8l	31.5033	2.61946	1.68866e-147	1.20207e-145
55	atrx	31.4836	1.4419	5.1703e-152	3.91177e-150
56	rps12	31.3847	1.05998	3.34084e-161	2.82047e-159
57	rpl11	31.3843	1.06727	2.51656e-160	2.10532e-158
58	rpl8	31.2381	1.01184	3.10639e-159	2.59094e-157
59	rack1	31.1173	1.06805	3.66166e-158	3.01771e-156
60	si:ch211-156b7.4	31.0206	2.00281	2.64258e-147	1.8715e-145
61	khdrbs1a	30.9693	1.1238	1.80449e-151	1.35049e-149
62	rpl10	30.923	1.04692	5.36002e-156	4.27736e-154
63	rpl7a	30.8417	1.03372	7.33263e-157	5.91977e-155
64	rplp2l	30.8225	1.14969	8.99248e-156	7.11459e-154
65	rpl17	30.7974	1.03112	4.56188e-156	3.65095e-154
66	rps23	30.7737	1.03016	9.20304e-156	7.26044e-154
67	rps7	30.7561	1.01434	1.75502e-156	1.40865e-154
68	smc1al	30.751	1.69733	3.1285e-145	2.17121e-143
69	rps4x	30.6778	1.06728	2.35141e-154	1.82902e-152
70	rpl23	30.5784	1.03116	2.32443e-154	1.81312e-152
71	cdk1	30.5145	3.07717	2.99676e-140	1.98051e-138
72	sumo3a	30.5112	1.50095	1.66127e-144	1.1415e-142
73	hnrnpa0b	30.4934	1.28252	2.56644e-146	1.79011e-144
74	rps3	30.4593	1.08566	2.78806e-151	2.07538e-149
75	rps19	30.4	1.08299	2.29217e-151	1.71085e-149
76	nusap1	30.3997	3.57499	8.19642e-139	5.36565e-137
77	rps16	30.3451	0.992664	1.20645e-151	9.07818e-150
78	rpl15	30.1879	1.10013	2.96841e-150	2.18032e-148
79	ranbp1	30.1857	1.6991	7.85666e-142	5.2934e-140
80	rps6	30.0589	1.11303	6.23685e-149	4.50926e-147
81	rps15a	29.9798	1.01489	5.16287e-149	3.75236e-147
82	rps27a	29.9552	1.01051	2.22181e-148	1.59803e-146
83	rpl7	29.8766	1.02048	6.59771e-148	4.72086e-146
84	rbbp4	29.8234	1.83359	6.26668e-139	4.1121e-137
85	rpl24	29.7609	0.985218	3.89326e-147	2.74321e-145
86	CABZ01058261.1	29.6278	2.82644	1.19349e-134	7.5627e-133
87	sox11a	29.4784	3.32004	7.70087e-133	4.74933e-131
88	rpl32	29.3923	0.991548	3.70467e-145	2.56465e-143
89	rpl18	29.2732	1.01068	5.78441e-143	3.92589e-141
90	rpl10a	29.1511	1.00363	4.72879e-142	3.19378e-140
91	si:ch211-137a8.4	29.1047	1.58495	5.6553e-134	3.55104e-132
92	rpl3	29.0032	1.0057	5.42411e-141	3.61055e-139
93	hdac1	28.8199	1.4061	2.81669e-133	1.7449e-131
94	snrpf	28.7966	1.45566	2.18879e-133	1.36202e-131
95	nono	28.7271	1.62074	4.41885e-131	2.66585e-129
96	rps25	28.7201	1.06541	3.94886e-138	2.56084e-136
97	chaf1a	28.6578	2.06461	1.65994e-130	9.99248e-129
98	ube2c	28.6253	3.31797	1.66778e-127	9.60137e-126
99	rpl23a	28.6029	1.04756	2.42823e-136	1.55289e-134

## Sheet: Cluster 7
	names	scores	logfoldchanges	pvals	pvals_adj
0	si:ch211-222l21.1	41.6128	1.77926	1.32055e-263	1.3799e-261
1	hmgb2b	38.623	1.60267	3.56473e-237	3.23642e-235
2	h2afvb	37.9501	1.41388	3.43647e-233	3.05979e-231
3	hmgn6	35.8895	1.15959	2.43786e-207	1.80018e-205
4	hnrnpa0l-1	35.5074	1.02433	8.02214e-205	5.80003e-203
5	rps19	34.6598	0.914957	1.42713e-212	1.1132e-210
6	tubb5	34.6143	1.91302	3.51024e-191	2.32541e-189
7	eef1g	34.5032	0.944486	1.86651e-212	1.44777e-210
8	hmgn2	34.451	1.66574	5.8125e-202	4.11647e-200
9	cirbpb	33.9592	0.873041	2.10154e-196	1.43334e-194
10	rps10	33.87	0.886373	3.23558e-205	2.34546e-203
11	rpl23	33.5192	0.87815	1.81837e-201	1.28123e-199
12	rplp0	33.4311	0.853234	6.21795e-203	4.43766e-201
13	rps12	33.3853	0.91177	9.9709e-199	6.90261e-197
14	rplp1	33.1302	0.839943	6.33539e-201	4.44135e-199
15	rpl11	33.084	0.883605	3.2291e-196	2.19698e-194
16	rpl17	33.0082	0.854162	6.49021e-197	4.44852e-195
17	fabp7a	32.9986	1.32153	8.20399e-185	5.21048e-183
18	rps9	32.1262	0.828431	1.54446e-188	1.00394e-186
19	rps5	31.8665	0.849497	6.37097e-186	4.07433e-184
20	rps3a	31.6819	0.832876	6.96677e-183	4.38447e-181
21	rps27.1	31.6628	0.856041	4.52892e-181	2.81821e-179
22	eef1b2	31.5572	0.932367	1.90058e-175	1.14411e-173
23	rpl15	31.4405	0.882216	4.46943e-180	2.76257e-178
24	rpl21	31.4132	0.838808	1.93716e-179	1.1947e-177
25	rps13	31.0982	0.845566	5.36681e-175	3.20977e-173
26	rpl7a	30.9918	0.810452	1.28728e-177	7.85158e-176
27	rpl8	30.9714	0.794834	1.25215e-175	7.55409e-174
28	rplp2l	30.9632	0.920136	4.57441e-175	2.74177e-173
29	rps7	30.8339	0.78795	6.98701e-177	4.24292e-175
30	rpl13	30.6825	0.80433	5.55388e-173	3.2932e-171
31	rpl12	30.4544	0.809612	1.92329e-169	1.11418e-167
32	rpl28	30.41	0.812544	3.59938e-169	2.0808e-167
33	rps4x	30.4074	0.82514	2.43109e-170	1.42324e-168
34	rpl10	30.3811	0.792707	2.58018e-170	1.50734e-168
35	rps15a	30.3337	0.827185	4.62712e-168	2.66382e-166
36	rpsa	30.1222	0.801591	1.09444e-167	6.27457e-166
37	rpl10a	29.9108	0.779753	1.01123e-165	5.73813e-164
38	si:dkey-151g10.6	29.9066	0.768597	7.00506e-165	3.91873e-163
39	rpl32	29.8028	0.828408	5.82236e-163	3.21811e-161
40	rps8a	29.782	0.771633	1.32968e-166	7.59177e-165
41	rpl24	29.7459	0.792007	2.12039e-162	1.16731e-160
42	rpl18	29.6037	0.791923	5.95155e-162	3.257e-160
43	rps25	29.5617	0.856717	4.06736e-160	2.1955e-158
44	rpl3	29.3028	0.778003	9.84303e-160	5.30279e-158
45	rpl35a	29.2965	0.839905	5.59156e-156	2.91593e-154
46	rps16	29.2581	0.781751	1.37289e-157	7.21381e-156
47	fabp3	29.0859	1.14913	5.51834e-149	2.7533e-147
48	rps24	28.8199	0.755633	8.39897e-155	4.3391e-153
49	stmn1b	28.6582	1.45516	2.94955e-144	1.40096e-142
50	faua	28.6014	0.820814	6.16323e-151	3.12004e-149
51	si:ch211-288g17.3	28.4407	1.32497	6.3541e-142	2.95717e-140
52	rps14	28.3609	0.728639	1.29216e-151	6.57743e-150
53	rps6	28.2532	0.825859	2.28015e-149	1.14383e-147
54	rps27a	28.1581	0.75181	1.58137e-148	7.80565e-147
55	sox11b	27.8289	2.15707	1.12308e-131	4.85169e-130
56	rpl7	27.6637	0.753323	4.7932e-144	2.26113e-142
57	rps15	27.6585	0.770884	1.25645e-142	5.86717e-141
58	rps2	27.6275	0.743544	9.56689e-146	4.61528e-144
59	rack1	27.5777	0.769946	1.34485e-143	6.3119e-142
60	rpl19	27.3254	0.712889	1.34838e-143	6.31778e-142
61	ppiaa	27.1644	0.85877	1.69056e-135	7.55052e-134
62	rps11	27.009	0.743216	5.0506e-137	2.27779e-135
63	rpl18a	26.992	0.726324	7.38458e-139	3.38553e-137
64	rps3	26.9862	0.789535	2.05148e-136	9.22202e-135
65	hnrnpabb	26.8531	1.01021	7.95143e-130	3.35645e-128
66	rps23	26.719	0.722134	1.7663e-136	7.95294e-135
67	cirbpa	26.6865	0.857137	2.07662e-131	8.9015e-130
68	rpl27	26.4981	0.747078	1.14025e-132	4.96456e-131
69	rpl23a	26.4875	0.792257	5.3222e-131	2.26038e-129
70	tp53inp2	26.2092	1.92651	2.70274e-120	1.06612e-118
71	khdrbs1a	26.0263	0.786469	3.64471e-125	1.48639e-123
72	rpl39	25.905	0.765112	1.19145e-125	4.88052e-124
73	cnp	25.8405	1.60069	9.21414e-119	3.57852e-117
74	rpl9	25.7685	0.810308	1.71814e-125	7.02762e-124
75	rpl13a	25.6954	0.666965	2.81131e-126	1.16191e-124
76	rps26l	25.577	0.781824	1.177e-123	4.75105e-122
77	ptmab	25.4765	0.82161	1.63467e-121	6.50369e-120
78	hnrnpaba	25.3942	0.783417	1.17825e-119	4.61485e-118
79	rpl36a	24.5431	0.736451	2.20871e-115	8.36679e-114
80	marcksb	24.384	1.15252	1.80823e-109	6.51976e-108
81	rpl5a	24.3176	0.778607	3.33768e-113	1.24225e-111
82	snrpb	24.2833	1.00574	1.26096e-109	4.55838e-108
83	rps17	24.1511	0.820434	9.72642e-111	3.56262e-109
84	rpl35	23.7337	0.702389	2.89297e-108	1.02704e-106
85	naca	23.6569	0.694909	1.42474e-107	5.00664e-106
86	rpl30	23.6118	0.687989	8.47817e-108	2.9945e-106
87	h3f3b.1	23.5604	0.950644	1.32882e-107	4.67551e-106
88	rpl31	23.5344	0.673664	3.87353e-107	1.35774e-105
89	hdac1	23.3736	1.00963	4.76362e-102	1.58736e-100
90	ddx39ab	23.3338	1.07085	1.15753e-101	3.83411e-100
91	RPS17	23.2841	0.667255	3.3766e-105	1.16151e-103
92	rpl22	23.1648	0.731656	7.70165e-103	2.59448e-101
93	uba52	22.6865	0.617799	3.14023e-101	1.03519e-99
94	snrpd1	22.4131	0.968627	6.53683e-96	2.04071e-94
95	rpl34	22.3978	0.673187	8.58717e-98	2.74581e-96
96	serbp1a	22.2253	0.69851	1.75677e-95	5.42933e-94
97	si:dkey-56m19.5	22.1332	1.58721	1.86994e-91	5.5738e-90
98	rpl14	22.0348	0.628465	2.63363e-95	8.12113e-94
99	insm1a	21.9572	2.05011	5.93648e-90	1.74694e-88

## Sheet: Cluster 8
	names	scores	logfoldchanges	pvals	pvals_adj
0	hmgb2a	67.1235	2.77935	0	0
1	neurod1	59.3122	4.45781	0	0
2	hmgn2	56.6804	2.80417	0	0
3	hmga1a	54.1599	2.22956	0	0
4	otx5	53.1366	4.29346	3.29212e-302	4.84904e-300
5	h3f3b.1	52.5937	2.42768	0	0
6	stmn1a	49.4676	3.09651	3.57902e-289	4.93068e-287
7	si:ch73-281n10.2	49.1177	2.2445	6.4193e-300	9.30664e-298
8	hmgb2b	48.6291	2.01179	0	0
9	nr2e3	47.9189	3.9563	8.91601e-270	1.10714e-267
10	pde6gb	44.3974	4.1421	3.09426e-247	3.42732e-245
11	h2afvb	43.6097	1.80959	3.08713e-269	3.78255e-267
12	h2afx	40.6395	3.02435	4.46768e-221	4.16547e-219
13	tuba8l4	40.1793	1.77005	3.30749e-231	3.28271e-229
14	tubb2b	39.5692	2.0978	2.14304e-225	2.02536e-223
15	hmgn6	38.9675	1.34511	1.73763e-226	1.64783e-224
16	stmn1b	38.7094	2.05016	7.34186e-220	6.79945e-218
17	faua	38.4235	1.19576	3.7897e-231	3.74788e-229
18	arl13a	38.1646	3.77763	6.71713e-202	5.56899e-200
19	chaf1a	37.5683	2.37839	2.03561e-203	1.70296e-201
20	crx	37.2001	3.14142	9.98024e-197	7.96434e-195
21	si:ch211-156b7.4	37.1531	2.18616	7.21121e-202	5.96076e-200
22	rps27.1	36.8212	1.13015	6.21862e-218	5.70198e-216
23	si:ch211-288g17.3	36.5741	1.6767	6.2625e-205	5.30321e-203
24	anp32e	35.8809	1.73558	2.43041e-193	1.91739e-191
25	inhbb	35.4822	3.08744	5.54515e-183	4.01965e-181
26	ptmab	35.3782	1.26814	2.08115e-197	1.67041e-195
27	dek	35.3662	2.23366	6.55331e-187	4.89131e-185
28	rplp1	35.1895	1.06607	2.75583e-206	2.36993e-204
29	h2afva	35.1489	1.8273	1.29235e-185	9.49243e-184
30	cirbpa	34.7504	1.18568	1.87852e-194	1.48623e-192
31	si:ch73-28h20.1	34.5794	4.08181	4.86025e-176	3.34789e-174
32	rbbp4	34.3582	1.93952	1.92455e-180	1.37352e-178
33	rps9	34.3197	1.02952	6.33979e-198	5.11822e-196
34	rps5	34.1325	1.08763	1.3236e-194	1.0502e-192
35	rplp2l	34.0351	1.17622	7.435e-193	5.84894e-191
36	rpl21	33.5185	1.05905	7.40915e-188	5.59038e-186
37	rpsa	33.4498	1.07692	1.69217e-186	1.25624e-184
38	rps10	33.0445	1.01064	3.60387e-186	2.6612e-184
39	rpl10	32.7447	1.04388	2.46616e-180	1.75554e-178
40	cxxc5a	32.58	2.1159	6.70845e-165	4.29016e-163
41	rpl7a	32.4385	1.02239	1.20441e-179	8.55165e-178
42	rpl11	32.3738	1.02766	1.30555e-178	9.19895e-177
43	rps23	32.3461	1.04291	4.2063e-177	2.93392e-175
44	rack1	32.3014	1.07636	3.69719e-176	2.55309e-174
45	insm1a	32.2234	2.8951	3.76006e-161	2.31893e-159
46	rps7	32.1926	1.02198	8.04234e-177	5.56751e-175
47	rps3	32.1295	1.04431	6.26692e-175	4.26381e-173
48	atp1a3b	31.9334	3.33261	2.25715e-157	1.32985e-155
49	rps19	31.8434	1.01019	3.30559e-174	2.23802e-172
50	rpl18a	31.7183	1.01771	7.45708e-172	4.98778e-170
51	rps4x	31.4954	1.0385	8.15e-170	5.36061e-168
52	ran	31.4587	1.13966	2.74649e-166	1.76867e-164
53	rps3a	31.3682	0.995695	1.95267e-169	1.27829e-167
54	rps25	31.3146	1.06758	2.4694e-167	1.60141e-165
55	rpl28	31.1291	0.963129	1.20066e-167	7.80458e-166
56	msi1	30.9537	1.65029	1.28875e-153	7.38857e-152
57	rpl8	30.8237	0.984677	2.15393e-163	1.36799e-161
58	six7	30.6011	3.94679	2.46996e-147	1.34902e-145
59	lbr	30.5852	2.21944	2.52157e-150	1.41346e-148
60	rpl24	30.4527	0.952076	7.22875e-161	4.41879e-159
61	rpl15	30.4052	1.06702	9.78823e-160	5.86679e-158
62	rps14	30.3407	0.921545	3.2027e-161	1.9796e-159
63	rpl23	30.2866	0.977214	3.80179e-160	2.29358e-158
64	rpl18	30.261	0.981683	7.85748e-159	4.69938e-157
65	rps16	30.2479	0.964312	2.90294e-158	1.72872e-156
66	pcna	30.1896	2.28107	1.53762e-148	8.53269e-147
67	rps6	30.1079	1.08072	9.90097e-157	5.79636e-155
68	khdrbs1a	30.1061	1.00444	4.61493e-154	2.6568e-152
69	rps12	30.0953	1.02113	1.61384e-157	9.52854e-156
70	rps8a	29.9816	0.976803	1.61224e-157	9.52854e-156
71	rrm2-1	29.9061	2.40602	1.38176e-145	7.45855e-144
72	rpl10a	29.8934	0.939995	1.01927e-156	5.95458e-155
73	rps24	29.7467	0.93827	8.02223e-155	4.62799e-153
74	rbp4l	29.586	3.06002	2.08672e-142	1.09438e-140
75	rps13	29.5544	0.949156	1.9359e-153	1.10759e-151
76	snrpd1	29.4967	1.34295	5.37506e-147	2.92418e-145
77	thrb	29.4904	3.61718	1.386e-139	7.09424e-138
78	rpl17	29.4806	0.951196	3.11048e-153	1.77593e-151
79	rpl13	29.3792	0.956986	1.42814e-151	8.05432e-150
80	rps15	29.2255	0.958226	1.45488e-149	8.12239e-148
81	rps27a	28.9952	0.949157	7.76214e-148	4.2817e-146
82	snrpf	28.9594	1.35566	5.93754e-142	3.08473e-140
83	rpl3	28.8518	0.95441	7.33931e-147	3.98496e-145
84	rpl19	28.736	0.925646	1.42991e-147	7.85629e-146
85	rpl7	28.6917	0.960864	3.33997e-145	1.79587e-143
86	seta	28.5775	1.25839	4.51555e-140	2.32416e-138
87	rps15a	28.4066	0.91184	3.77741e-144	2.01542e-142
88	uba52	28.3742	0.907005	3.29407e-142	1.72106e-140
89	rpl32	28.3633	0.912044	3.92325e-144	2.0892e-142
90	mki67	28.3106	2.18618	1.2829e-134	6.24335e-133
91	rpl30	28.2894	0.941928	3.79104e-141	1.95854e-139
92	ppiab	28.2831	0.947445	1.3726e-137	6.8116e-136
93	si:dkey-151g10.6	28.1833	0.889485	1.21886e-141	6.3205e-140
94	rps2	28.0612	0.917724	5.29262e-142	2.75485e-140
95	eef1g	27.7497	0.959606	5.8104e-139	2.95764e-137
96	slbp	27.7419	2.34187	4.23371e-129	1.98704e-127
97	cct2-1	27.7366	1.25108	1.72106e-132	8.24533e-131
98	mibp	27.6861	2.5889	2.60644e-128	1.21507e-126
99	rxrgb	27.6721	3.21361	3.25903e-127	1.4991e-125

## Sheet: Cluster 9
	names	scores	logfoldchanges	pvals	pvals_adj
0	pde6gb	45.3186	5.80534	4.63856e-136	3.78898e-134
1	h3f3b.1	34.278	2.06403	3.7574e-114	2.4714e-112
2	tmsb4x	34.1576	1.99291	2.14518e-108	1.3289e-106
3	hmgb1b	28.2717	1.8091	2.26665e-89	1.14745e-87
4	h2afvb	27.3001	1.63161	1.69903e-88	8.47711e-87
5	hmgn2	26.919	2.1634	8.13247e-87	4.01419e-85
6	prox1a	26.9122	3.60612	1.21464e-81	5.58714e-80
7	tubb5	24.9281	2.35923	1.6217e-76	7.0276e-75
8	zeb2a	22.976	2.63786	4.12995e-68	1.58837e-66
9	tubb2b	22.9033	1.90859	1.59102e-69	6.27593e-68
10	si:ch211-288g17.3	22.4731	1.65769	4.45157e-68	1.70969e-66
11	h3f3d	22.4657	0.929173	7.87083e-69	3.07407e-67
12	cotl1	22.4277	1.61679	3.92399e-67	1.49257e-65
13	ywhah	22.3971	2.09093	1.88464e-66	7.1392e-65
14	hmgn6	22.19	1.08627	3.11102e-68	1.19815e-66
15	rem1	21.4986	8.35446	3.9815e-62	1.38507e-60
16	onecut1	21.4303	5.1814	5.69509e-62	1.97375e-60
17	tfap2b	21.3271	5.26853	1.27815e-61	4.40763e-60
18	hmgb2b	21.2542	1.52817	3.17455e-64	1.15363e-62
19	stmn1a	21.2137	2.57837	5.90441e-62	2.04374e-60
20	ptmab	21.0887	1.10457	1.19668e-63	4.29238e-62
21	fabp3	21.0306	1.37756	8.75161e-63	3.08322e-61
22	eef1g	20.9629	0.913055	2.31708e-65	8.58932e-64
23	rps27.1	20.503	0.867427	5.66018e-63	1.99918e-61
24	onecutl	20.3442	7.40942	6.30115e-58	2.04555e-56
25	tox	20.2713	2.24189	3.24503e-58	1.05591e-56
26	golga7ba	20.1752	2.91044	1.11437e-57	3.60069e-56
27	CR361564.1	19.958	7.87608	1.66594e-56	5.28426e-55
28	ndrg4	19.7997	2.13695	1.27374e-56	4.05415e-55
29	stmn1b	19.5475	1.51113	3.976e-57	1.2743e-55
30	rbfox2	19.0284	3.17993	2.17519e-53	6.49766e-52
31	rpl28	18.7783	0.775095	7.90364e-56	2.4702e-54
32	rps10	18.549	0.764748	3.83067e-55	1.18652e-53
33	rps9	18.3002	0.718525	2.07726e-54	6.3141e-53
34	rbbp4	18.2825	1.73268	3.94426e-51	1.13065e-49
35	rps5	18.0777	0.736728	2.06956e-53	6.18878e-52
36	rps19	17.9774	0.791886	2.75469e-52	8.03795e-51
37	hnrnpaba	17.9333	0.935697	1.22141e-50	3.46536e-49
38	rps12	17.9332	0.755777	1.6636e-52	4.8955e-51
39	rpl10	17.8806	0.713867	2.37543e-52	6.94593e-51
40	rps4x	17.8334	0.733099	3.43169e-52	9.97135e-51
41	nme2b.1	17.7888	0.871106	1.00102e-50	2.84883e-49
42	seta	17.738	1.20439	1.3153e-49	3.62768e-48
43	faua	17.6912	0.793982	6.83988e-51	1.95462e-49
44	hmgn7	17.5682	1.3019	1.66701e-48	4.46432e-47
45	rpl7a	17.4232	0.697598	1.26246e-50	3.57816e-49
46	si:ch73-1a9.3	17.1526	1.24574	4.12101e-47	1.07656e-45
47	si:ch211-222l21.1	17.1126	1.31214	1.23942e-47	3.27489e-46
48	atrx	17.0637	1.23673	1.17011e-46	2.99736e-45
49	si:ch73-281n10.2	17.0429	1.51354	1.41504e-46	3.61808e-45
50	rpl32	16.8869	0.71674	6.63235e-48	1.76763e-46
51	sumo3a	16.8608	1.30855	8.6631e-46	2.17095e-44
52	rpl23	16.6083	0.67206	4.61761e-47	1.20288e-45
53	rplp1	16.4643	0.633801	7.24528e-47	1.87855e-45
54	rack1	16.4553	0.720065	4.85735e-46	1.22948e-44
55	six6b	15.9718	2.49233	6.54819e-42	1.49362e-40
56	rpl24	15.9695	0.700263	9.50991e-44	2.28395e-42
57	khdrbs1a	15.9505	0.82304	6.82503e-43	1.60299e-41
58	rpl21	15.8582	0.657527	9.87773e-44	2.37023e-42
59	chd4a	15.7956	1.60951	1.70092e-41	3.84805e-40
60	hnrnpa0l-1	15.7127	0.720775	3.24204e-42	7.48752e-41
61	rps3a	15.6973	0.670446	6.29083e-43	1.47877e-41
62	hmgb2a	15.6841	1.46122	1.36966e-41	3.11133e-40
63	rpsa	15.6361	0.666254	1.07869e-42	2.52068e-41
64	rpl17	15.562	0.653774	1.79788e-42	4.1731e-41
65	rplp2l	15.5487	0.759737	3.50799e-42	8.07479e-41
66	rpl19	15.4513	0.632404	3.30277e-42	7.62142e-41
67	plekhg4	15.4241	2.68905	8.04542e-40	1.74734e-38
68	cirbpa	15.3225	0.796741	1.08651e-40	2.41659e-39
69	h3f3b.1-1	15.3171	1.08402	5.07275e-40	1.11395e-38
70	si:dkey-28b4.7	15.1167	1.68742	7.10873e-39	1.5038e-37
71	rpl18	15.0465	0.639845	3.16048e-40	6.95682e-39
72	h2afx	15.0105	2.10859	2.06557e-38	4.32333e-37
73	fkbp1aa	14.938	1.04314	1.68624e-38	3.54008e-37
74	ndufa4l	14.9	0.926854	1.30155e-38	2.73661e-37
75	rpl11	14.884	0.668128	1.79131e-39	3.84819e-38
76	tmsb	14.8601	1.91751	6.09926e-38	1.26324e-36
77	zc4h2	14.8499	2.01616	8.18414e-38	1.69125e-36
78	rps3	14.8394	0.708161	4.79196e-39	1.01759e-37
79	rpl13	14.8368	0.597651	1.31089e-39	2.82708e-38
80	rpl8	14.6075	0.605775	1.80693e-38	3.78772e-37
81	rps8a	14.5514	0.602846	1.88924e-38	3.95727e-37
82	rps7	14.4946	0.593028	3.11325e-38	6.49165e-37
83	rpl3	14.4873	0.630447	6.70576e-38	1.38781e-36
84	pclaf	14.4233	2.17311	3.30024e-36	6.55104e-35
85	tmeff1b	14.4035	1.49879	3.15974e-36	6.28116e-35
86	rps27a	14.2509	0.582784	4.14053e-37	8.41817e-36
87	mab21l1	14.2196	1.89615	1.8605e-35	3.62045e-34
88	uba52	14.1674	0.620056	2.07312e-36	4.15388e-35
89	si:ch211-156b7.4	14.1285	1.59843	2.92254e-35	5.6593e-34
90	rps6	14.1061	0.69013	3.0512e-36	6.06973e-35
91	lsm6	14.0396	1.41093	7.21131e-35	1.38193e-33
92	rps14	14.0236	0.589618	4.36025e-36	8.61811e-35
93	pcdh8	14.0096	4.08331	1.55846e-34	2.9599e-33
94	rps25	13.9027	0.687786	2.52224e-35	4.88757e-34
95	chaf1a	13.8414	1.68763	3.7262e-34	7.02397e-33
96	rpl10a	13.8091	0.583319	2.92619e-35	5.6624e-34
97	rrm2-1	13.7393	2.04043	1.03072e-33	1.922e-32
98	dalrd3	13.66	3.84213	3.20907e-33	5.9084e-32
99	rps13	13.617	0.589053	1.87095e-34	3.54368e-33

## Sheet: Cluster 10
	names	scores	logfoldchanges	pvals	pvals_adj
0	elavl3	77.9972	6.28474	1.36538e-219	2.53749e-217
1	tmsb	69.5407	4.78854	7.93436e-207	1.3078e-204
2	tubb5	69.387	5.39448	1.34124e-205	2.19765e-203
3	stmn1b	66.6868	3.85068	1.92354e-213	3.32904e-211
4	gap43	63.1454	8.219	1.6937e-186	2.3687e-184
5	tuba1c	54.2268	4.22229	4.00453e-171	4.88499e-169
6	mllt11	53.4115	4.73561	1.0334e-166	1.23878e-164
7	stmn2b	52.8268	7.84368	4.17747e-163	4.86043e-161
8	vim	52.4755	4.24716	1.61723e-166	1.93029e-164
9	tmsb4x	47.3296	2.27781	2.38456e-159	2.64124e-157
10	marcksl1b	44.2812	2.22469	2.45979e-157	2.67114e-155
11	rbpms2b	42.3329	3.40283	2.45661e-139	2.25251e-137
12	tuba1a	41.57	2.99081	1.81633e-138	1.64905e-136
13	uchl1	41.3485	4.45741	6.60778e-135	5.79038e-133
14	fabp3	41.1875	2.42757	9.71483e-141	8.9971e-139
15	gng3	39.7363	4.54401	4.68521e-129	3.83841e-127
16	rtn1a	39.2991	3.11747	3.29357e-129	2.7063e-127
17	tmsb2	38.1269	5.78056	2.5691e-123	1.98164e-121
18	cnp	36.7899	3.6323	2.23547e-120	1.66404e-118
19	rtn1b	36.766	4.31827	1.37979e-119	1.01616e-117
20	stmn2a	35.2411	7.41644	7.73538e-114	5.32837e-112
21	dpysl3	35.1865	4.67809	3.31802e-114	2.30274e-112
22	klf7b	34.3878	2.97493	2.6218e-113	1.78379e-111
23	vdac3	34.22	2.9019	2.19601e-112	1.48679e-110
24	si:dkey-280e21.3	33.886	5.15834	8.26963e-110	5.40081e-108
25	alcama	33.7036	4.88474	3.18798e-109	2.06258e-107
26	nova2	33.135	2.7076	1.08411e-109	7.04699e-108
27	ywhaz	33.0588	3.03855	2.91432e-108	1.86807e-106
28	rbfox2	33.0565	4.42822	2.24599e-107	1.4232e-105
29	inab	32.7971	7.99009	8.98564e-106	5.60409e-104
30	jpt1b	32.7145	2.79027	2.45005e-107	1.54896e-105
31	elavl4	32.1735	7.08375	9.87062e-104	5.92901e-102
32	islr2	32.0327	6.5281	2.81394e-103	1.67212e-101
33	map1b	31.8087	4.40217	4.46761e-103	2.64343e-101
34	si:dkey-276j7.1	31.6746	3.55944	7.79194e-103	4.58103e-101
35	vat1	31.2251	2.38204	4.15899e-104	2.50908e-102
36	stmn4l	30.5963	7.51803	2.5895e-98	1.45153e-96
37	si:dkey-56m19.5	29.8425	2.89128	2.82309e-97	1.56036e-95
38	rab6bb	29.5552	4.51709	5.58817e-95	2.99888e-93
39	gdi1	29.2864	3.56204	2.12495e-94	1.12941e-92
40	stmn4	29.1655	8.48896	2.93108e-93	1.53721e-91
41	tubb4b	29.0707	1.3475	1.99028e-98	1.12475e-96
42	tubb2	28.9846	7.38816	1.20881e-92	6.3157e-91
43	cfl1	28.3221	1.29472	4.94e-94	2.61556e-92
44	tuba2	27.8302	5.60006	1.23032e-88	6.08372e-87
45	anxa13l	27.743	6.78753	3.19958e-88	1.57092e-86
46	scrt2	27.6256	4.4558	3.18654e-88	1.56729e-86
47	maptb	27.5245	4.89145	1.10321e-87	5.3689e-86
48	gpm6aa	27.4131	1.51947	3.64259e-91	1.86101e-89
49	tubb2b	27.312	1.84771	7.06386e-92	3.64256e-90
50	tmeff1b	26.7013	2.42932	1.24185e-85	5.92899e-84
51	eef1g	26.6732	1.29814	5.71694e-91	2.91543e-89
52	zgc:65894	26.3463	5.25903	3.03433e-83	1.40743e-81
53	h2afx1	25.9499	1.57925	4.27586e-85	2.02398e-83
54	marcksb	25.8138	1.75935	4.0236e-84	1.89164e-82
55	ywhag2	25.3465	3.98283	8.79035e-80	3.92603e-78
56	ppp1r14ba	25.034	4.9147	2.44589e-78	1.07166e-76
57	kif3cb	24.9793	5.97331	4.80378e-78	2.09483e-76
58	dpysl2b	24.6315	3.52029	4.59526e-77	1.97896e-75
59	dbi	24.5958	1.68715	1.34016e-78	5.89054e-77
60	dpysl5a	24.4741	3.19829	1.41232e-76	6.0446e-75
61	ank2b	24.3939	2.93243	1.77983e-76	7.60574e-75
62	alcamb	24.0671	4.35236	9.85685e-75	4.07382e-73
63	kif1aa	23.98	3.95214	1.68169e-74	6.94005e-73
64	gpm6ab	23.6716	1.62828	1.06804e-75	4.47429e-74
65	nsg2	23.2961	2.44574	1.78044e-72	7.10405e-71
66	syt11a	22.9769	2.69035	3.31304e-71	1.29761e-69
67	epb41a	22.9206	2.39903	7.89061e-71	3.05166e-69
68	zgc:153426	22.8614	4.54161	4.31948e-70	1.6498e-68
69	tuba8l4	22.6835	1.43079	2.95771e-72	1.17506e-70
70	prdx2	22.4749	1.33064	2.8057e-70	1.07608e-68
71	ebf3a-1	22.448	7.20912	2.29584e-68	8.60272e-67
72	zgc:101840	22.2658	4.98606	9.66803e-68	3.57911e-66
73	ywhah	22.2023	2.36012	4.07661e-68	1.52342e-66
74	map7d2b	22.1634	7.87236	3.00822e-67	1.10478e-65
75	ywhaqa	21.7057	2.02518	2.7925e-66	1.01081e-64
76	csdc2a	21.6513	2.83296	1.00719e-65	3.62207e-64
77	si:dkeyp-75h12.5	21.2955	2.49182	2.06384e-64	7.19772e-63
78	fkbp1aa	21.1502	1.32205	4.72685e-65	1.66528e-63
79	hmgb1b	21.0846	1.36009	3.40697e-65	1.20642e-63
80	si:busm1-57f23.1	21.0655	4.32435	3.74134e-63	1.27745e-61
81	hsp90ab1	20.9858	1.07182	2.65057e-64	9.20916e-63
82	gng5	20.9149	1.87156	2.65466e-63	9.0978e-62
83	dclk1b	20.9095	4.90309	1.88132e-62	6.38428e-61
84	add2	20.8987	5.77241	2.31216e-62	7.83671e-61
85	prph	20.8111	8.07297	5.56856e-62	1.86955e-60
86	si:ch211-284f22.3	20.7737	3.9737	5.56996e-62	1.86955e-60
87	cd99l2	20.7537	4.00291	7.09093e-62	2.37718e-60
88	anxa5b	20.6639	4.87867	1.74711e-61	5.80783e-60
89	si:ch211-195b15.8	20.3317	3.04167	1.67402e-60	5.46642e-59
90	si:dkey-28b4.7	20.1896	2.10619	3.31031e-60	1.07086e-58
91	scg2b	20.1448	6.47096	2.14236e-59	6.86621e-58
92	rps19	19.9968	0.791599	9.77819e-64	3.36776e-62
93	tbcb	19.7953	1.86586	1.09743e-58	3.46905e-57
94	adcyap1b	19.6167	8.51585	2.7173e-57	8.32352e-56
95	coro1cb	19.5578	2.98323	2.43071e-57	7.46216e-56
96	zc4h2	19.4721	2.49944	3.48206e-57	1.06426e-55
97	kif5aa	19.3673	4.66858	2.17909e-56	6.53749e-55
98	eml1	19.2841	3.15232	3.41236e-56	1.02043e-54
99	sox11b	19.2697	2.32067	1.36407e-56	4.12815e-55

[truncated: 5 more sheets: Cluster 11, Cluster 12, Cluster 13, Cluster 14, Cluster 15]
