# Supplementary material for: Single-cell RNA sequencing unravels the transcriptional network underlying zebrafish retina regeneration
Source: eLife. 2023 Nov 21;12:RP86507. doi: 10.7554/eLife.86507 (PMC10662954; doi:10.7554/eLife.86507)
Supplement: Supplementary file 4. [file elife-86507-supp4.xlsx]

## Sheet: Reactive Müller glia 1
	group	names	scores	logfoldchanges	pvals	pvals_adj
0	Reactive Müller glia (1)	hsp90aa1.2	78.9628	6.15652	0	0
1	Reactive Müller glia (1)	hsp70.3	67.379	7.59897	0	0
2	Reactive Müller glia (1)	fosab	60.3201	3.86451	0	0
3	Reactive Müller glia (1)	cxcl18b	54.4112	6.12793	2.30576e-308	7.09433e-305
4	Reactive Müller glia (1)	si:ch73-335l21.4	54.2547	3.79962	0	0
5	Reactive Müller glia (1)	apoeb	50.1569	4.11577	0	0
6	Reactive Müller glia (1)	hsp70l	49.6275	9.19806	3.89467e-262	1.07847e-258
7	Reactive Müller glia (1)	stm	49.1516	11.4888	6.82148e-259	1.71722e-255
8	Reactive Müller glia (1)	ubb	48.8015	2.94004	0	0
9	Reactive Müller glia (1)	hspa5	48.5893	3.12991	0	0
10	Reactive Müller glia (1)	fosl1a	47.7895	3.23979	0	0
11	Reactive Müller glia (1)	sox4a-1	43.4118	4.17095	9.65624e-249	2.22826e-245
12	Reactive Müller glia (1)	hsp70.2	42.7385	7.74445	2.3631e-221	3.63536e-218
13	Reactive Müller glia (1)	jdp2b	40.4221	3.47695	1.29423e-235	2.23991e-232
14	Reactive Müller glia (1)	jund	39.8269	2.88029	1.02457e-235	1.89143e-232
15	Reactive Müller glia (1)	jun	38.3374	2.3798	1.08746e-244	2.15091e-241
16	Reactive Müller glia (1)	her6	37.6234	3.61491	6.69349e-220	9.75523e-217
17	Reactive Müller glia (1)	mmp9	37.065	3.24572	8.96375e-214	1.24108e-210
18	Reactive Müller glia (1)	hspb1	37.0235	5.57728	7.96871e-188	8.82646e-185
19	Reactive Müller glia (1)	dnajb1b	36.9039	4.20069	1.15999e-191	1.46006e-188
20	Reactive Müller glia (1)	socs3a	35.8863	4.15243	2.52114e-189	3.03535e-186
21	Reactive Müller glia (1)	hsp70.1	34.8815	8.2025	1.60445e-170	1.23413e-167
22	Reactive Müller glia (1)	mcl1a	34.0312	2.24066	7.97669e-189	9.20344e-186
23	Reactive Müller glia (1)	cebpb	33.6638	3.92901	1.38143e-172	1.15919e-169
24	Reactive Müller glia (1)	zgc:158343	33.4909	2.86063	6.65706e-183	6.82744e-180
25	Reactive Müller glia (1)	rtn4a	33.158	1.5354	5.65073e-195	7.45116e-192
26	Reactive Müller glia (1)	UBB	33.1517	2.01945	1.13784e-185	1.21185e-182
27	Reactive Müller glia (1)	krt8	33.0938	2.6819	1.48168e-179	1.36764e-176
28	Reactive Müller glia (1)	mych	32.5988	2.41679	1.61761e-182	1.59976e-179
29	Reactive Müller glia (1)	phlda2	32.4048	3.69195	4.86583e-163	3.28633e-160
30	Reactive Müller glia (1)	ier2b	32.1304	2.7241	3.20532e-171	2.53596e-168
31	Reactive Müller glia (1)	sgk1	31.5703	2.19303	8.86871e-173	7.67449e-170
32	Reactive Müller glia (1)	junba	31.5586	2.03827	4.41117e-180	4.21206e-177
33	Reactive Müller glia (1)	atp1b1a	31.2271	2.14311	3.19751e-169	2.39304e-166
34	Reactive Müller glia (1)	mycb	30.6794	3.1677	3.20625e-154	1.97298e-151
35	Reactive Müller glia (1)	junbb	30.3205	2.22112	4.19186e-167	2.90192e-164
36	Reactive Müller glia (1)	s100a10b	29.8493	4.04363	3.07535e-142	1.60678e-139
37	Reactive Müller glia (1)	gadd45bb	29.5377	3.26328	2.54467e-146	1.46801e-143
38	Reactive Müller glia (1)	foxj1a	29.4665	2.68225	3.41987e-148	2.01489e-145
39	Reactive Müller glia (1)	her15.1-1	29.2541	2.39309	2.0699e-158	1.36471e-155
40	Reactive Müller glia (1)	hsp90b1	29.0763	2.43212	3.09597e-146	1.71461e-143
41	Reactive Müller glia (1)	spry4	28.7033	2.90503	1.13561e-140	5.71751e-138
42	Reactive Müller glia (1)	klf6a	28.3497	2.06353	3.04066e-146	1.71461e-143
43	Reactive Müller glia (1)	angptl4	27.8325	1.89259	1.49515e-142	7.96194e-140
44	Reactive Müller glia (1)	atp1a1b	27.824	2.74352	7.53331e-133	3.59664e-130
45	Reactive Müller glia (1)	arrdc3b	27.6632	2.76281	5.01046e-133	2.43412e-130
46	Reactive Müller glia (1)	cdkn1a	27.34	3.31927	1.18441e-128	5.37666e-126
47	Reactive Müller glia (1)	nocta	26.7305	2.11559	2.3618e-129	1.09001e-126
48	Reactive Müller glia (1)	zfand2a	26.6372	3.61768	6.27266e-120	2.44643e-117
49	Reactive Müller glia (1)	txn	26.6317	2.05768	1.06726e-131	5.00907e-129
50	Reactive Müller glia (1)	socs3b	26.4721	2.5866	3.04189e-127	1.33703e-124
51	Reactive Müller glia (1)	eno1a	26.3053	1.91191	3.18135e-128	1.42088e-125
52	Reactive Müller glia (1)	hbegfa	26.1929	2.14431	6.40229e-127	2.77009e-124
53	Reactive Müller glia (1)	cd99	26.1838	3.46875	1.19069e-117	4.57938e-115
54	Reactive Müller glia (1)	krt18a.1	26.1001	4.83647	2.03518e-114	7.51416e-112
55	Reactive Müller glia (1)	klf11b	26.0177	3.25855	1.63601e-117	6.20585e-115
56	Reactive Müller glia (1)	fosb	25.8789	2.24045	4.89197e-123	2.02184e-120
57	Reactive Müller glia (1)	irs2b	25.445	3.12473	7.28012e-114	2.65255e-111
58	Reactive Müller glia (1)	atf3	25.4096	1.90136	2.03101e-120	8.27067e-118
59	Reactive Müller glia (1)	rhov	25.1762	3.69861	1.32057e-110	4.68819e-108
60	Reactive Müller glia (1)	brd2a	25.1392	1.45868	4.22813e-120	1.67259e-117
61	Reactive Müller glia (1)	gapdhs	24.9885	1.26729	3.17954e-120	1.27601e-117
62	Reactive Müller glia (1)	cd63	24.6896	1.63531	1.7112e-114	6.40336e-112
63	Reactive Müller glia (1)	hspb8	24.667	3.82696	4.55245e-106	1.50074e-103
64	Reactive Müller glia (1)	STMP1	24.2788	1.95518	4.75021e-110	1.66504e-107
65	Reactive Müller glia (1)	mCherry	24.0994	2.18879	1.97392e-107	6.66583e-105
66	Reactive Müller glia (1)	mcl1b	23.9672	2.34856	6.61738e-106	2.15579e-103
67	Reactive Müller glia (1)	pim3	23.6801	1.85374	4.62235e-107	1.54214e-104
68	Reactive Müller glia (1)	CR383676.1	23.6038	0.715097	1.03587e-107	3.54125e-105
69	Reactive Müller glia (1)	ascl1a	23.5724	3.16264	2.30931e-101	7.4357e-99
70	Reactive Müller glia (1)	pdgfrb	22.9104	3.37295	3.34229e-95	9.54139e-93
71	Reactive Müller glia (1)	dusp1	22.7774	2.23164	9.59195e-98	2.7959e-95
72	Reactive Müller glia (1)	tob1b	22.7653	2.98366	2.55284e-94	7.21333e-92
73	Reactive Müller glia (1)	marcksl1b	22.7235	1.13314	3.0808e-101	9.8058e-99
74	Reactive Müller glia (1)	pgam1a	22.7032	2.1958	3.14493e-97	9.07147e-95
75	Reactive Müller glia (1)	c7b	22.6899	3.57465	1.65472e-93	4.62838e-91
76	Reactive Müller glia (1)	rasgef1ba	22.6766	1.82463	1.90798e-98	5.74281e-96
77	Reactive Müller glia (1)	si:dkey-7j14.6	22.3821	1.16927	3.54467e-99	1.07863e-96
78	Reactive Müller glia (1)	tomm20a	22.3719	1.53264	6.38338e-98	1.90067e-95
79	Reactive Müller glia (1)	CABZ01080568.1	22.3473	7.76489	1.13455e-88	2.80506e-86
80	Reactive Müller glia (1)	tcima	22.3096	3.76971	2.56509e-90	6.76476e-88
81	Reactive Müller glia (1)	anxa11a	22.2737	2.72024	5.8133e-92	1.59382e-89
82	Reactive Müller glia (1)	fkbp5	22.2567	3.94175	7.01147e-90	1.83165e-87
83	Reactive Müller glia (1)	adgrg1-1	22.0966	3.0259	1.53474e-90	4.08639e-88
84	Reactive Müller glia (1)	alkbh3-1	22.0447	3.28372	1.57506e-89	4.03841e-87
85	Reactive Müller glia (1)	glula	21.9769	2.31834	3.56477e-91	9.67764e-89
86	Reactive Müller glia (1)	pim2	21.8734	2.94321	5.32092e-89	1.3274e-86
87	Reactive Müller glia (1)	prdx6	21.4866	1.88713	1.88194e-89	4.781e-87
88	Reactive Müller glia (1)	cdh2	21.4623	1.06296	2.52421e-92	6.98978e-90
89	Reactive Müller glia (1)	rgs5b	21.3166	5.72308	1.19515e-82	2.69064e-80
90	Reactive Müller glia (1)	oaz1a	21.2593	1.02035	1.48111e-90	3.98189e-88
91	Reactive Müller glia (1)	dab2ipb	21.2508	2.0171	2.01317e-87	4.93333e-85
92	Reactive Müller glia (1)	pgk1	21.2352	1.91807	2.03684e-87	4.94756e-85
93	Reactive Müller glia (1)	tuft1a	21.1485	2.9248	4.51981e-84	1.05175e-81
94	Reactive Müller glia (1)	ppp1r15a	20.9794	2.83879	6.81234e-83	1.55901e-80
95	Reactive Müller glia (1)	hspa4a	20.9243	1.90333	1.68779e-84	3.96072e-82
96	Reactive Müller glia (1)	rtn3	20.8596	1.94978	1.01094e-84	2.39264e-82
97	Reactive Müller glia (1)	bsg	20.822	1.3136	2.62624e-86	6.26923e-84
98	Reactive Müller glia (1)	MYO1D	20.7081	3.31341	1.71564e-80	3.74078e-78
99	Reactive Müller glia (1)	rpz5	20.3744	4.09142	1.48107e-77	3.0156e-75

## Sheet: Müller glia_Progenitor 1
	group	names	scores	logfoldchanges	pvals	pvals_adj
100	Progenitors 1	hmgn6	39.5742	2.13189	3.9794e-247	8.47642e-244
101	Progenitors 1	ckbb	36.0878	2.63646	4.33402e-225	7.05962e-222
102	Progenitors 1	h3f3b.1-1	30.9533	2.00845	4.98378e-175	4.4518e-172
103	Progenitors 1	fabp7a	30.8224	1.70225	1.68392e-168	1.22709e-165
104	Progenitors 1	gpm6aa	30.8102	2.00667	2.22896e-172	1.81535e-169
105	Progenitors 1	h3f3c	30.0842	2.4304	3.18355e-168	2.26041e-165
106	Progenitors 1	hmgn2	29.662	1.72382	4.38087e-155	2.75706e-152
107	Progenitors 1	stmn1a	28.7132	2.58966	3.05007e-155	1.96417e-152
108	Progenitors 1	acbd7	28.1555	2.37002	2.45069e-150	1.47526e-147
109	Progenitors 1	fabp3	27.8539	1.38769	5.64928e-143	3.06734e-140
110	Progenitors 1	si:dkey-238o13.4	27.1673	2.51218	2.13897e-141	1.09686e-138
111	Progenitors 1	si:ch73-1a9.3	27.1104	1.59544	2.30085e-138	1.13773e-135
112	Progenitors 1	hmgb1b	25.7202	1.37341	1.16056e-124	4.94417e-122
113	Progenitors 1	GFP	25.2292	3.1537	6.45801e-124	2.70953e-121
114	Progenitors 1	cadm3	23.7875	1.58651	1.74388e-111	6.2714e-109
115	Progenitors 1	h3f3b.1	23.6888	1.42185	4.88788e-109	1.69188e-106
116	Progenitors 1	crabp1a	22.6815	1.22391	4.09906e-101	1.28985e-98
117	Progenitors 1	si:ch211-288g17.3	22.5292	1.24347	4.16775e-100	1.29673e-97
118	Progenitors 1	mdkb	22.3305	1.66378	1.54366e-99	4.7495e-97
119	Progenitors 1	hmgb1a	22.2556	1.19846	8.81704e-98	2.59737e-95
120	Progenitors 1	hmgb2a	21.2691	1.31797	1.44934e-89	3.7508e-87
121	Progenitors 1	tdh	20.9472	1.73939	3.12551e-89	7.86805e-87
122	Progenitors 1	nr2e1	20.6432	2.29147	6.26793e-87	1.50926e-84
123	Progenitors 1	ptmab	20.2871	0.838802	7.24e-83	1.6433e-80
124	Progenitors 1	tspan7	20.161	1.41909	3.57462e-83	8.24874e-81
125	Progenitors 1	tmsb	19.9558	1.71685	8.49575e-82	1.86711e-79
126	Progenitors 1	cbsb	19.6266	2.2346	2.17811e-79	4.63955e-77
127	Progenitors 1	marcksb	19.61	1.08326	1.88144e-78	3.94688e-76
128	Progenitors 1	hmgb2b	19.4942	0.92587	5.55082e-77	1.12195e-74
129	Progenitors 1	dek	19.2137	1.4442	3.06292e-76	6.05823e-74
130	Progenitors 1	CU467822.1	18.4358	1.45571	1.31682e-70	2.35252e-68
131	Progenitors 1	tuba1c	17.8664	1.41055	6.21352e-67	1.0181e-64
132	Progenitors 1	sox9b	17.6863	1.85936	9.06653e-66	1.47683e-63
133	Progenitors 1	si:dkey-28b4.7	17.6291	2.13015	2.48376e-65	3.9756e-63
134	Progenitors 1	adh5	17.5719	1.54255	5.89701e-65	9.38472e-63
135	Progenitors 1	rcor2	17.48	3.0611	7.46242e-64	1.18081e-61
136	Progenitors 1	ankrd12	17.234	1.49466	1.01161e-62	1.56495e-60
137	Progenitors 1	sesn2	17.2013	1.95556	1.70477e-62	2.59379e-60
138	Progenitors 1	crabp2a	17.0272	1.98603	2.31665e-61	3.46759e-59
139	Progenitors 1	psat1	16.9514	1.09207	2.40227e-60	3.53837e-58
140	Progenitors 1	smc1al	16.6596	1.14508	1.24513e-58	1.75913e-56
141	Progenitors 1	klf7b	16.6487	1.63822	7.05791e-59	1.00743e-56
142	Progenitors 1	hmgb3a	16.5269	1.26806	5.76952e-58	7.94845e-56
143	Progenitors 1	marcksa	16.4978	1.59945	6.94347e-58	9.47151e-56
144	Progenitors 1	apex1	16.4893	1.37417	9.16934e-58	1.24465e-55
145	Progenitors 1	h2afvb	16.4527	0.720244	5.42446e-57	7.25646e-55
146	Progenitors 1	rcc2	16.3029	1.53221	1.16291e-56	1.54818e-54
147	Progenitors 1	sod1	16.2666	1.18836	2.97369e-56	3.88418e-54
148	Progenitors 1	slc7a3a	16.215	1.49866	4.52281e-56	5.87987e-54
149	Progenitors 1	rpl12	16.1548	0.574338	8.85134e-55	1.11919e-52
150	Progenitors 1	celf2	16.0477	1.94982	5.25414e-55	6.70472e-53
151	Progenitors 1	top2b	15.6083	1.32046	3.09889e-52	3.71478e-50
152	Progenitors 1	tp53inp1	15.2565	1.76397	3.68415e-50	4.32279e-48
153	Progenitors 1	rab39ba	15.2384	3.1776	1.36598e-49	1.54389e-47
154	Progenitors 1	h1f0	15.2238	1.35394	9.21453e-50	1.05875e-47
155	Progenitors 1	ptprz1a	15.1914	2.72171	1.79207e-49	2.01725e-47
156	Progenitors 1	tp53inp2	15.0532	1.48433	6.23535e-49	6.90652e-47
157	Progenitors 1	nova2	15.0495	1.10754	9.37227e-49	1.03397e-46
158	Progenitors 1	seta	14.9729	0.802234	4.55879e-48	4.95048e-46
159	Progenitors 1	ubtf	14.8129	1.30316	1.89938e-47	1.98474e-45
160	Progenitors 1	prdx2	14.7368	0.803641	9.60726e-47	9.85314e-45
161	Progenitors 1	fads2	14.6799	2.17893	1.1438e-46	1.16445e-44
162	Progenitors 1	si:ch211-137a8.4	14.4559	1.09681	3.14677e-45	3.14574e-43
163	Progenitors 1	lbr	14.425	1.25321	3.42258e-45	3.40916e-43
164	Progenitors 1	pou3f1	14.1987	4.80945	3.99382e-43	3.81355e-41
165	Progenitors 1	creb1a	14.1076	1.33547	2.18094e-43	2.09696e-41
166	Progenitors 1	atf5b	14.0265	1.59684	5.81073e-43	5.51044e-41
167	Progenitors 1	smarca4a	13.694	1.07464	5.26203e-41	4.74629e-39
168	Progenitors 1	sept4a	13.5458	1.69441	2.71528e-40	2.4099e-38
169	Progenitors 1	nucks1a	13.255	0.945909	1.42614e-38	1.20769e-36
170	Progenitors 1	phc2a	13.1677	1.3561	3.12754e-38	2.61646e-36
171	Progenitors 1	acin1a	13.0752	0.839773	1.70299e-37	1.40349e-35
172	Progenitors 1	nfyba	12.8991	1.45151	8.10163e-37	6.54059e-35
173	Progenitors 1	atrx	12.8652	0.781367	1.9664e-36	1.56021e-34
174	Progenitors 1	si:ch73-215f7.1	12.8641	2.22411	1.46237e-36	1.17375e-34
175	Progenitors 1	tnrc6c2	12.8473	2.21801	1.74011e-36	1.39264e-34
176	Progenitors 1	snrpd1	12.8338	0.702585	3.64087e-36	2.832e-34
177	Progenitors 1	si:ch73-46j18.5	12.8279	0.922019	2.59746e-36	2.04336e-34
178	Progenitors 1	hmga1a	12.825	0.682489	2.6087e-36	2.04639e-34
179	Progenitors 1	baz2ba	12.8204	1.11589	2.43202e-36	1.92415e-34
180	Progenitors 1	gpm6ab	12.7981	1.26179	3.35734e-36	2.61882e-34
181	Progenitors 1	slc6a15	12.7862	4.33443	8.89186e-36	6.85862e-34
182	Progenitors 1	csdc2a	12.5268	1.59623	6.93536e-35	5.14872e-33
183	Progenitors 1	anp32a	12.512	0.839898	1.07478e-34	7.87349e-33
184	Progenitors 1	cebpg	12.506	1.05013	9.82796e-35	7.21873e-33
185	Progenitors 1	si:dkey-108k21.10	12.5006	1.63115	9.5919e-35	7.06407e-33
186	Progenitors 1	polb	12.3213	1.64777	7.7224e-34	5.53992e-32
187	Progenitors 1	hdac1	12.2738	0.751042	1.95235e-33	1.38267e-31
188	Progenitors 1	ddx39ab	12.2402	0.691922	2.97795e-33	2.09295e-31
189	Progenitors 1	h3f3d	12.2021	0.499157	5.01394e-33	3.47972e-31
190	Progenitors 1	znf1035	12.1861	1.37062	3.75782e-33	2.62772e-31
191	Progenitors 1	slc1a4	12.1718	1.80516	4.4091e-33	3.07537e-31
192	Progenitors 1	actl6a	12.1583	0.940167	5.94754e-33	4.10706e-31
193	Progenitors 1	selenow2a	12.1341	1.18649	7.03658e-33	4.82302e-31
194	Progenitors 1	klf7a	12.1255	2.64358	9.99224e-33	6.81515e-31
195	Progenitors 1	zgc:153867	12.1211	0.730896	1.14362e-32	7.76173e-31
196	Progenitors 1	pacsin1b	12.0948	2.46928	1.298e-32	8.78798e-31
197	Progenitors 1	ap1s2	11.9897	1.1879	3.56696e-32	2.38007e-30
198	Progenitors 1	nudt21	11.9896	1.14147	3.74e-32	2.48953e-30
199	Progenitors 1	ncam1a	11.9268	1.20493	7.43388e-32	4.91293e-30
