# Supplementary material for: Single-cell RNA sequencing unravels the transcriptional network underlying zebrafish retina regeneration
Source: eLife. 2023 Nov 21;12:RP86507. doi: 10.7554/eLife.86507 (PMC10662954; doi:10.7554/eLife.86507)
Supplement: Supplementary file 5. [file elife-86507-supp5.xlsx]

## Sheet: Reactive Müller glia 2
	group	names	scores	logfoldchanges	pvals	pvals_adj
0	Reactive Müller glia (2)	marcksl1a	28.4522	1.56692	3.15719e-141	1.68127e-138
1	Reactive Müller glia (2)	slc1a2b	27.8605	4.33119	5.69715e-119	1.99696e-116
2	Reactive Müller glia (2)	fxyd6l	27.3548	2.33426	3.30552e-125	1.25388e-122
3	Reactive Müller glia (2)	zgc:165604	26.4808	2.03406	9.75475e-122	3.55419e-119
4	Reactive Müller glia (2)	crlf1a	26.2714	2.14504	3.52416e-124	1.30117e-121
5	Reactive Müller glia (2)	dusp5	25.3542	2.67504	1.58993e-109	4.44715e-107
6	Reactive Müller glia (2)	sparc	24.7882	2.37652	3.89039e-106	1.05616e-103
7	Reactive Müller glia (2)	f3a	24.013	1.54146	1.88801e-110	5.38977e-108
8	Reactive Müller glia (2)	hbegfa	23.4558	2.12144	5.50121e-100	1.36012e-97
9	Reactive Müller glia (2)	cnn2	23.029	1.92594	3.173e-97	7.38349e-95
10	Reactive Müller glia (2)	mdka	22.8087	1.14226	2.23697e-98	5.43367e-96
11	Reactive Müller glia (2)	cnn3a	22.7117	1.9504	1.30028e-93	2.81298e-91
12	Reactive Müller glia (2)	CR383676.1	22.3731	0.709742	1.19154e-94	2.66089e-92
13	Reactive Müller glia (2)	krt8	22.3566	2.22081	3.62541e-90	7.0698e-88
14	Reactive Müller glia (2)	mvp	21.9173	1.67802	3.08276e-89	5.76789e-87
15	Reactive Müller glia (2)	selenop	21.8242	3.01091	7.66507e-84	1.27864e-81
16	Reactive Müller glia (2)	txn	21.7661	1.9465	1.20282e-88	2.23539e-86
17	Reactive Müller glia (2)	si:ch1073-303k11.2	21.7145	1.68999	1.03998e-89	1.98607e-87
18	Reactive Müller glia (2)	gfap	21.4123	1.51608	2.37829e-86	4.11607e-84
19	Reactive Müller glia (2)	icn	21.2472	3.99854	6.96444e-79	1.02038e-76
20	Reactive Müller glia (2)	atp1b1a	21.222	1.90065	2.81061e-83	4.60525e-81
21	Reactive Müller glia (2)	sgk1	21.0359	1.68541	4.80799e-84	8.06898e-82
22	Reactive Müller glia (2)	rhbg	21.0199	2.39486	6.01521e-81	9.20261e-79
23	Reactive Müller glia (2)	col18a1a	20.8469	1.99822	8.44351e-81	1.28467e-78
24	Reactive Müller glia (2)	myl6	20.3352	1.38188	4.4794e-81	6.89106e-79
25	Reactive Müller glia (2)	c7b	20.1806	3.56112	1.7528e-73	2.24707e-71
26	Reactive Müller glia (2)	clcf1	20.0511	1.7099	1.36351e-77	1.91659e-75
27	Reactive Müller glia (2)	alkbh3-1	19.6639	3.39678	1.84926e-70	2.1248e-68
28	Reactive Müller glia (2)	rlbp1a	19.2255	3.39512	5.26908e-68	5.69945e-66
29	Reactive Müller glia (2)	cd99	19.1855	2.99494	3.83306e-68	4.16241e-66
30	Reactive Müller glia (2)	grb10b	18.902	1.87971	1.33329e-68	1.48273e-66
31	Reactive Müller glia (2)	rtn4a	18.8769	1.03217	2.58869e-71	3.05036e-69
32	Reactive Müller glia (2)	anxa13	18.844	1.88663	2.42577e-68	2.66555e-66
33	Reactive Müller glia (2)	apoeb	18.7593	2.6212	3.57575e-66	3.61372e-64
34	Reactive Müller glia (2)	aplp2	18.6998	2.01431	8.70283e-67	9.02585e-65
35	Reactive Müller glia (2)	gstp1	18.6766	2.20873	2.92108e-66	2.96292e-64
36	Reactive Müller glia (2)	mych	18.4314	1.6334	2.50522e-67	2.63772e-65
37	Reactive Müller glia (2)	cdo1	18.3033	3.02517	4.74135e-63	4.42063e-61
38	Reactive Müller glia (2)	pros1	18.1752	2.13212	1.74024e-63	1.62801e-61
39	Reactive Müller glia (2)	myl9b	18.0138	1.36822	9.91914e-65	9.63757e-63
40	Reactive Müller glia (2)	spock3	17.8017	3.21343	5.2553e-60	4.57624e-58
41	Reactive Müller glia (2)	acbd7	17.7896	1.1685	1.7589e-64	1.69117e-62
42	Reactive Müller glia (2)	ckbb	17.6482	1.09838	5.58181e-64	5.27528e-62
43	Reactive Müller glia (2)	eml2	17.4748	1.84493	6.09356e-60	5.28955e-58
44	Reactive Müller glia (2)	efhd1	17.4281	2.39109	5.79085e-59	4.90381e-57
45	Reactive Müller glia (2)	flna	17.0974	1.31608	2.73871e-59	2.34791e-57
46	Reactive Müller glia (2)	zfand5a	16.9432	1.67754	4.14454e-57	3.37548e-55
47	Reactive Müller glia (2)	tob1b	16.6149	2.22604	2.02313e-54	1.55187e-52
48	Reactive Müller glia (2)	vmp1	16.4526	1.2454	1.84597e-56	1.46888e-54
49	Reactive Müller glia (2)	bzw1b	16.2472	1.00603	3.205e-54	2.4449e-52
50	Reactive Müller glia (2)	lepb	16.067	1.83457	2.60324e-52	1.89701e-50
51	Reactive Müller glia (2)	irs2b	16.0307	2.34375	3.67283e-51	2.60113e-49
52	Reactive Müller glia (2)	kitlgb	15.9755	3.88247	9.47146e-50	6.39693e-48
53	Reactive Müller glia (2)	errfi1a	15.6393	1.82852	1.23636e-49	8.26958e-48
54	Reactive Müller glia (2)	zic2b	15.6219	1.32899	3.32076e-50	2.28177e-48
55	Reactive Müller glia (2)	fosl1a	15.5932	1.63391	7.87792e-50	5.33368e-48
56	Reactive Müller glia (2)	epas1b	15.5809	2.75481	2.97263e-48	1.88364e-46
57	Reactive Müller glia (2)	s100a10b	15.4264	2.78108	2.69129e-47	1.63356e-45
58	Reactive Müller glia (2)	il11b	15.4008	3.16239	4.49841e-47	2.69622e-45
59	Reactive Müller glia (2)	ca14	15.3469	3.26786	1.03944e-46	6.15025e-45
60	Reactive Müller glia (2)	vim	15.3415	1.47963	1.14893e-48	7.39882e-47
61	Reactive Müller glia (2)	klf6a	15.3303	1.33379	1.02466e-48	6.64494e-47
62	Reactive Müller glia (2)	cadm4	15.2917	1.4755	3.9779e-48	2.50346e-46
63	Reactive Müller glia (2)	ppdpfb	15.2391	0.702868	3.85657e-49	2.51868e-47
64	Reactive Müller glia (2)	elovl1b	15.1091	1.502	4.5671e-47	2.73148e-45
65	Reactive Müller glia (2)	ywhag2	14.8185	2.54495	2.39259e-44	1.28149e-42
66	Reactive Müller glia (2)	col2a1a	14.7624	2.11918	1.9119e-44	1.03001e-42
67	Reactive Müller glia (2)	igfbp5b	14.7455	1.94826	1.41898e-44	7.73486e-43
68	Reactive Müller glia (2)	hsd11b2	14.588	3.33084	7.78818e-43	3.95711e-41
69	Reactive Müller glia (2)	pygl	14.5615	2.34855	4.52716e-43	2.30444e-41
70	Reactive Müller glia (2)	chmp4ba	14.1931	1.74399	1.0317e-41	5.00329e-40
71	Reactive Müller glia (2)	sall1b	14.1046	1.98962	3.58437e-41	1.69666e-39
72	Reactive Müller glia (2)	dhrs13l1	14.0995	3.33369	2.45293e-40	1.12831e-38
73	Reactive Müller glia (2)	wfdc2	14.0594	3.25041	3.64611e-40	1.66608e-38
74	Reactive Müller glia (2)	si:dkey-7j14.6	13.7215	0.804625	2.248e-40	1.03576e-38
75	Reactive Müller glia (2)	dab2ipb	13.6077	1.51548	4.82689e-39	2.13176e-37
76	Reactive Müller glia (2)	spry4	13.5392	1.86093	2.30372e-38	9.92105e-37
77	Reactive Müller glia (2)	tnfrsf21	13.4103	1.68222	6.89161e-38	2.90465e-36
78	Reactive Müller glia (2)	akap12b	13.4	1.0286	3.25963e-38	1.39294e-36
79	Reactive Müller glia (2)	cotl1	13.0785	0.965142	7.34032e-37	2.98474e-35
80	Reactive Müller glia (2)	zgc:162780	13.0228	1.68716	6.79896e-36	2.64796e-34
81	Reactive Müller glia (2)	midn	13.0082	0.977434	1.33337e-36	5.37442e-35
82	Reactive Müller glia (2)	ctsla	13.0038	0.776681	2.62846e-36	1.04426e-34
83	Reactive Müller glia (2)	ecm1b	12.9364	3.175	7.53678e-35	2.83176e-33
84	Reactive Müller glia (2)	zgc:165461	12.8479	2.51381	1.32334e-34	4.932e-33
85	Reactive Müller glia (2)	ahnak	12.7801	3.01858	3.57022e-34	1.31292e-32
86	Reactive Müller glia (2)	ptgdsb.2	12.6927	3.25297	1.40968e-33	5.06954e-32
87	Reactive Müller glia (2)	gsna	12.6813	2.10452	4.61896e-34	1.69185e-32
88	Reactive Müller glia (2)	irf2	12.6487	1.73926	4.02895e-34	1.47965e-32
89	Reactive Müller glia (2)	lygl1	12.6465	2.54683	1.2032e-33	4.33825e-32
90	Reactive Müller glia (2)	igsf9ba	12.5885	2.51994	2.06292e-33	7.39953e-32
91	Reactive Müller glia (2)	fam129bb	12.575	1.39748	6.3061e-34	2.29163e-32
92	Reactive Müller glia (2)	myl9a	12.5373	2.64376	3.70433e-33	1.31172e-31
93	Reactive Müller glia (2)	cdh2	12.519	0.663453	2.3676e-34	8.78836e-33
94	Reactive Müller glia (2)	cd82a	12.501	0.81131	4.55091e-34	1.66913e-32
95	Reactive Müller glia (2)	inhbaa	12.4466	2.09491	5.4642e-33	1.92017e-31
96	Reactive Müller glia (2)	zgc:174888	12.3536	3.04492	3.45272e-32	1.18622e-30
97	Reactive Müller glia (2)	nocta	12.297	1.16097	8.28284e-33	2.89231e-31
98	Reactive Müller glia (2)	nfkbiaa	12.1744	2.49617	1.4257e-31	4.768e-30
99	Reactive Müller glia (2)	slc12a4	12.134	1.54915	9.03948e-32	3.05259e-30

## Sheet: Müller glia_Progenitor 1
	group	names	scores	logfoldchanges	pvals	pvals_adj
100	Progenitors 1	hmgb2a	59.8831	4.03202	0	0
101	Progenitors 1	hmgn2	53.2841	3.66034	0	7.12587e-308
102	Progenitors 1	hmgb2b	48.8952	3.31904	4.3391e-280	2.40308e-276
103	Progenitors 1	h3f3b.1	46.5799	2.92252	4.41093e-305	3.05357e-301
104	Progenitors 1	tubb2b	45.2831	3.77976	0	0
105	Progenitors 1	si:ch211-222l21.1	44.287	3.04455	9.88749e-273	3.42243e-269
106	Progenitors 1	hmga1a	42.3158	2.80543	8.35846e-263	2.57171e-259
107	Progenitors 1	si:ch73-281n10.2	42.1779	3.14758	6.873e-276	3.172e-272
108	Progenitors 1	h2afvb	42.1617	2.77058	5.3262e-232	1.13452e-228
109	Progenitors 1	pcna	41.4144	3.79442	6.90736e-273	2.73245e-269
110	Progenitors 1	seta	39.3664	2.57385	1.94869e-237	4.49677e-234
111	Progenitors 1	si:ch211-288g17.3	39.0311	2.78609	1.94779e-225	3.59575e-222
112	Progenitors 1	si:ch211-156b7.4	38.8352	3.28355	2.83412e-247	7.13452e-244
113	Progenitors 1	dek	38.7508	3.69934	2.30663e-248	6.38729e-245
114	Progenitors 1	hmgb1b	37.8106	2.30659	1.47606e-214	2.40433e-211
115	Progenitors 1	hmgb1a	37.6093	2.51217	1.00453e-212	1.54535e-209
116	Progenitors 1	stmn1a	36.7328	3.83821	1.00919e-226	1.99611e-223
117	Progenitors 1	mki67	36.1039	4.58439	5.61121e-216	9.71125e-213
118	Progenitors 1	cirbpa	35.1159	1.89343	3.05929e-187	4.03404e-184
119	Progenitors 1	rrm1	33.8137	3.67984	9.19935e-200	1.34073e-196
120	Progenitors 1	rbbp4	33.7573	2.96474	1.05168e-199	1.4561e-196
121	Progenitors 1	ptmab	32.606	1.62253	1.83565e-168	1.69437e-165
122	Progenitors 1	lbr	32.2993	3.8358	7.49947e-184	9.43945e-181
123	Progenitors 1	rrm2-1	32.1719	4.30576	4.33305e-181	4.99944e-178
124	Progenitors 1	cbx3a	32.1096	2.28767	5.03908e-180	5.36681e-177
125	Progenitors 1	snrpd1	31.9868	2.0241	1.20583e-171	1.1514e-168
126	Progenitors 1	stmn1b	31.8838	2.81672	1.10969e-180	1.22914e-177
127	Progenitors 1	khdrbs1a	31.8628	1.81637	5.59486e-163	4.55669e-160
128	Progenitors 1	rpa2	31.8077	3.26281	1.04752e-181	1.26117e-178
129	Progenitors 1	hnrnpaba	31.7318	1.63493	1.11049e-165	9.91955e-163
130	Progenitors 1	ran	31.6478	1.6464	3.90193e-163	3.27419e-160
131	Progenitors 1	anp32b	31.6227	2.78754	1.81632e-179	1.8628e-176
132	Progenitors 1	chaf1a	31.3312	2.99051	6.21193e-177	6.14338e-174
133	Progenitors 1	snrpe	30.5504	2.30483	3.15996e-165	2.73446e-162
134	Progenitors 1	pclaf	30.1753	4.3443	3.95535e-162	3.12936e-159
135	Progenitors 1	snrpb	30.1612	1.93357	3.01764e-153	2.1426e-150
136	Progenitors 1	hnrnpa0b	29.8003	1.67335	1.18222e-152	7.98461e-150
137	Progenitors 1	cirbpb	29.7659	1.4922	5.32594e-143	3.00981e-140
138	Progenitors 1	hnrnpabb	29.5688	1.67234	1.16827e-149	7.52337e-147
139	Progenitors 1	tuba8l4	29.5132	1.99999	1.76964e-156	1.32441e-153
140	Progenitors 1	slbp	29.4879	4.30079	3.11056e-156	2.2667e-153
141	Progenitors 1	banf1	29.3821	3.00074	2.46161e-159	1.89346e-156
142	Progenitors 1	ahcy	28.9737	2.33497	1.15182e-152	7.97378e-150
143	Progenitors 1	sumo3a	28.8721	2.10961	9.43537e-150	6.22083e-147
144	Progenitors 1	snrpf	28.6029	1.96884	8.71015e-145	5.02485e-142
145	Progenitors 1	tuba1a	28.2593	2.26164	9.24689e-146	5.81944e-143
146	Progenitors 1	hnrnpa1b	28.1613	2.11301	8.10745e-145	4.77667e-142
147	Progenitors 1	CABZ01005379.1	28.0657	4.08111	2.66251e-145	1.60277e-142
148	Progenitors 1	rpa3	27.8627	3.01105	9.53791e-146	5.8692e-143
149	Progenitors 1	ccna2	27.8513	5.19319	7.52554e-140	3.7889e-137
150	Progenitors 1	calm2b	27.7676	2.04461	8.40851e-142	4.56549e-139
151	Progenitors 1	smc2	27.5794	4.49333	3.62861e-139	1.79428e-136
152	Progenitors 1	abhd6a	27.4647	3.58073	3.09837e-142	1.71594e-139
153	Progenitors 1	si:ch73-1a9.3	27.4144	1.86426	1.52212e-132	7.02486e-130
154	Progenitors 1	lig1	27.324	3.17306	5.52781e-141	2.88812e-138
155	Progenitors 1	sumo3b	27.3063	2.56958	1.4525e-140	7.44834e-138
156	Progenitors 1	ddx39ab	27.1376	1.86255	3.16625e-132	1.41414e-129
157	Progenitors 1	her15.1-1	27.034	3.49558	6.67955e-138	3.24497e-135
158	Progenitors 1	top2a	27.0128	4.96751	1.24855e-132	5.85995e-130
159	Progenitors 1	ppm1g	26.8296	2.37865	3.09797e-135	1.47907e-132
160	Progenitors 1	ranbp1	26.7291	1.87046	2.76203e-132	1.25383e-129
161	Progenitors 1	si:ch211-137a8.4	26.3145	2.23499	5.61329e-131	2.46727e-128
162	Progenitors 1	anp32a	26.2509	1.99578	6.20557e-130	2.68498e-127
163	Progenitors 1	cks1b	26.1472	4.26171	1.91073e-128	8.01668e-126
164	Progenitors 1	mibp	26.0582	4.34823	3.82374e-127	1.58035e-124
165	Progenitors 1	anp32e	25.9747	1.89625	1.42785e-125	5.49146e-123
166	Progenitors 1	fen1	25.9578	3.09647	4.80172e-129	2.04561e-126
167	Progenitors 1	zgc:110540	25.9522	4.49955	8.64676e-126	3.37236e-123
168	Progenitors 1	h2afx	25.7121	2.89678	6.20625e-127	2.52731e-124
169	Progenitors 1	id1	25.6934	3.15725	6.78323e-127	2.72224e-124
170	Progenitors 1	baz1b	25.6245	2.44253	5.37033e-126	2.12443e-123
171	Progenitors 1	cbx5	25.4694	2.53628	8.19629e-125	3.06707e-122
172	Progenitors 1	tuba1c	25.108	2.3052	2.8591e-121	1.0282e-118
173	Progenitors 1	CABZ01058261.1	25.0197	4.61706	1.09153e-117	3.73155e-115
174	Progenitors 1	her4.1	24.998	3.35963	5.19017e-121	1.84258e-118
175	Progenitors 1	hdac1	24.8968	1.7543	3.22077e-116	1.07453e-113
176	Progenitors 1	setb	24.7479	1.79962	2.10914e-116	7.12247e-114
177	Progenitors 1	nutf2l	24.6904	3.12016	2.33054e-118	8.06687e-116
178	Progenitors 1	smc1al	24.6607	1.88741	7.17873e-116	2.3665e-113
179	Progenitors 1	magoh	24.5881	1.99314	7.817e-116	2.54659e-113
180	Progenitors 1	cdk1	24.5451	4.64332	1.11759e-113	3.51672e-111
181	Progenitors 1	hnrnpa0l-1	24.518	1.10617	1.33626e-110	3.85442e-108
182	Progenitors 1	ncapg	24.481	4.88628	1.02537e-113	3.26361e-111
183	Progenitors 1	smc4	24.4673	3.82594	4.30858e-115	1.38731e-112
184	Progenitors 1	syncrip	24.4313	1.53115	8.27317e-111	2.43715e-108
185	Progenitors 1	snrpd2	24.4052	1.75911	3.88243e-113	1.20796e-110
186	Progenitors 1	taf15	24.2833	1.95781	5.42469e-113	1.65071e-110
187	Progenitors 1	dhfr	24.2351	3.96429	4.52218e-113	1.39138e-110
188	Progenitors 1	cenpf	24.1723	4.71934	8.45492e-111	2.46448e-108
189	Progenitors 1	actl6a	24.0629	2.28343	1.40295e-112	4.22271e-110
190	Progenitors 1	dut	23.9954	3.15513	2.27669e-112	6.77889e-110
191	Progenitors 1	h2afva	23.8516	1.94911	2.58034e-110	7.29105e-108
192	Progenitors 1	mad2l1	23.6815	4.58841	1.30205e-107	3.56981e-105
193	Progenitors 1	nasp	23.6314	3.37217	2.74055e-109	7.58885e-107
194	Progenitors 1	marcksb	23.5623	1.46428	2.78193e-104	7.3366e-102
195	Progenitors 1	tpx2	23.279	5.67999	5.2971e-103	1.37086e-100
196	Progenitors 1	srsf2a	23.2782	1.75562	5.86812e-105	1.56244e-102
197	Progenitors 1	lmnb2	23.1116	2.7273	1.56467e-105	4.20653e-103
198	Progenitors 1	aurkb	23.0279	4.60386	1.38036e-102	3.50674e-100
199	Progenitors 1	si:ch73-21g5.7	23.0068	3.86603	2.17283e-103	5.67621e-101
