# Supplementary material for: Single-cell RNA sequencing unravels the transcriptional network underlying zebrafish retina regeneration
Source: eLife. 2023 Nov 21;12:RP86507. doi: 10.7554/eLife.86507 (PMC10662954; doi:10.7554/eLife.86507)
Supplement: Supplementary file 6. [file elife-86507-supp6.xlsx]

## Sheet: Müller glia_Progenitor_1
	group	names	scores	logfoldchanges	pvals	pvals_adj
0	Progenitors 1	id1	33.204	4.41395	5.75714e-190	1.59421e-185
1	Progenitors 1	si:dkey-238o13.4	30.187	2.93445	2.41979e-168	3.35032e-164
2	Progenitors 1	f3a	29.4928	2.4894	1.28939e-161	1.19015e-157
3	Progenitors 1	crlf1a	29.2616	3.75857	1.70749e-155	9.4564e-152
4	Progenitors 1	pim1	28.9083	2.22412	9.15906e-156	6.34059e-152
5	Progenitors 1	si:ch1073-303k11.2	27.4872	4.21479	1.32714e-138	5.24999e-135
6	Progenitors 1	acbd7	26.4878	2.14128	9.05032e-135	3.13265e-131
7	Progenitors 1	her4.1	26.0442	3.31304	6.24892e-130	1.92265e-126
8	Progenitors 1	nrarpa	25.8404	2.95999	3.44587e-128	9.54197e-125
9	Progenitors 1	her12	25.7044	4.23325	4.07338e-124	1.02542e-120
10	Progenitors 1	akap12b	24.7073	2.19533	2.5841e-119	5.96302e-116
11	Progenitors 1	notch3	23.9893	2.59041	2.61101e-113	5.56166e-110
12	Progenitors 1	six3b	23.8104	1.77922	6.94542e-110	1.37375e-106
13	Progenitors 1	ppdpfb	23.029	1.32956	8.80738e-102	1.43462e-98
14	Progenitors 1	myl6	22.7005	2.12992	7.0509e-103	1.22029e-99
15	Progenitors 1	ckbb	22.6621	1.65315	8.651e-101	1.33086e-97
16	Progenitors 1	her4.2	22.0659	2.8397	1.86227e-97	2.71411e-94
17	Progenitors 1	s1pr1	21.7841	2.38902	1.43979e-95	1.99346e-92
18	Progenitors 1	crabp1a	21.3804	1.16767	2.702e-90	2.49404e-87
19	Progenitors 1	abhd6a	21.2936	2.58516	9.24309e-92	1.0238e-88
20	Progenitors 1	mdka	21.2233	1.11277	2.5648e-89	2.29103e-86
21	Progenitors 1	clcf1	21.1951	2.95519	2.18337e-90	2.08482e-87
22	Progenitors 1	lfng	21.1499	2.12735	1.06777e-90	1.05599e-87
23	Progenitors 1	zgc:165604	20.9498	2.27742	3.97112e-89	3.43639e-86
24	Progenitors 1	sgk1	20.5726	2.15396	2.68294e-86	2.25131e-83
25	Progenitors 1	cnn2	20.5713	2.75284	8.35891e-86	6.61333e-83
26	Progenitors 1	flna	20.5213	2.27269	7.19102e-86	5.85667e-83
27	Progenitors 1	tjp2b	19.5517	2.8358	3.29797e-78	2.40327e-75
28	Progenitors 1	CU467822.1	19.5419	1.55237	3.77546e-78	2.68068e-75
29	Progenitors 1	rtn4a	19.517	1.21257	1.00621e-77	6.96571e-75
30	Progenitors 1	zgc:158343	19.3307	2.21715	5.58129e-77	3.6798e-74
31	Progenitors 1	mmp9	19.0408	3.24499	2.58362e-74	1.62598e-71
32	Progenitors 1	marcksl1b	18.8203	1.07451	5.2198e-72	3.07535e-69
33	Progenitors 1	nr2e1	18.0992	2.0584	2.02728e-68	1.14566e-65
34	Progenitors 1	yap1	18.0141	1.95983	7.131e-68	3.94929e-65
35	Progenitors 1	gfap	17.9388	1.54244	4.7752e-67	2.54289e-64
36	Progenitors 1	si:ch211-251b21.1	17.4214	1.65951	7.45271e-64	3.75224e-61
37	Progenitors 1	tpm4a	17.3204	3.76093	2.42917e-62	1.18011e-59
38	Progenitors 1	her9	17.2383	1.61029	2.08573e-62	1.03136e-59
39	Progenitors 1	sox9b	17.1651	1.83498	4.36255e-62	2.08282e-59
40	Progenitors 1	f3b	16.9472	2.16722	1.26159e-60	5.82245e-58
41	Progenitors 1	btg2	16.886	1.0138	1.18238e-59	5.28085e-57
42	Progenitors 1	errfi1a	16.839	3.91862	4.93794e-59	2.09158e-56
43	Progenitors 1	zgc:109949	16.7702	1.86363	1.46172e-59	6.42482e-57
44	Progenitors 1	midn	16.3671	1.43438	6.78456e-57	2.68388e-54
45	Progenitors 1	si:ch73-21g5.7	16.0161	2.18496	9.70802e-55	3.68253e-52
46	Progenitors 1	nrarpb	15.5676	2.93793	1.14266e-51	4.16335e-49
47	Progenitors 1	cspg5a	15.4924	2.867	2.78344e-51	9.88156e-49
48	Progenitors 1	her4.2-1	15.3502	2.39941	1.69373e-50	5.79024e-48
49	Progenitors 1	si:dkey-7j14.6	15.3314	1.08029	3.95005e-50	1.31784e-47
50	Progenitors 1	sox2	15.0937	1.38306	6.70307e-49	2.15831e-46
51	Progenitors 1	slc12a4	15.0574	3.73626	2.60877e-48	8.11678e-46
52	Progenitors 1	lgals2a	14.9986	1.881	1.54288e-48	4.85498e-46
53	Progenitors 1	sparc	14.8677	2.27691	1.07034e-47	3.2216e-45
54	Progenitors 1	BX465834.1	14.7945	1.47226	2.84698e-47	8.47696e-45
55	Progenitors 1	igfbp5b	14.7243	2.64857	1.16236e-46	3.3528e-44
56	Progenitors 1	txn	14.7022	1.46299	8.83317e-47	2.57473e-44
57	Progenitors 1	myl9b	14.5418	1.42346	8.91002e-46	2.49219e-43
58	Progenitors 1	qkia	14.4765	1.29759	2.37642e-45	6.58056e-43
59	Progenitors 1	bzw1b	14.4581	0.966614	4.71056e-45	1.29149e-42
60	Progenitors 1	dab2ipb	14.2918	2.51897	2.48768e-44	6.6237e-42
61	Progenitors 1	her15.1-1	14.1023	1.56866	2.819e-43	7.16155e-41
62	Progenitors 1	fxyd6l	14.0761	1.64013	3.46773e-43	8.72955e-41
63	Progenitors 1	notch1b	13.8611	2.19294	5.87197e-42	1.43895e-39
64	Progenitors 1	cdh2	13.7579	0.834817	4.10347e-41	9.79562e-39
65	Progenitors 1	cnn3a	13.6949	1.52116	4.72616e-41	1.11857e-38
66	Progenitors 1	her4.4	13.6623	2.61735	8.68483e-41	2.02094e-38
67	Progenitors 1	angptl4	13.3533	1.23113	4.21544e-39	9.41369e-37
68	Progenitors 1	rasgef1bb	13.2478	1.08943	1.63561e-38	3.59458e-36
69	Progenitors 1	mCherry	13.2113	1.57485	2.05378e-38	4.47805e-36
70	Progenitors 1	tmsb4x	13.0516	0.654317	3.96049e-37	8.50155e-35
71	Progenitors 1	LO018196.1	12.8398	2.25103	1.94855e-36	4.11887e-34
72	Progenitors 1	dusp5	12.8189	1.96302	2.39675e-36	5.02791e-34
73	Progenitors 1	her15.1	12.8157	1.63744	2.44066e-36	5.08152e-34
74	Progenitors 1	fosab	12.7846	1.46615	3.54653e-36	7.32888e-34
75	Progenitors 1	nocta	12.7373	1.49496	6.28927e-36	1.28056e-33
76	Progenitors 1	jdp2b	12.7198	1.81629	8.07726e-36	1.62078e-33
77	Progenitors 1	gpm6aa	12.5017	0.740196	1.87556e-34	3.53307e-32
78	Progenitors 1	col18a1a	12.4822	1.59651	1.27666e-34	2.455e-32
79	Progenitors 1	fhl3b	12.3825	2.87316	5.13445e-34	9.41576e-32
80	Progenitors 1	fosl1a	12.3746	1.60726	4.50352e-34	8.36959e-32
81	Progenitors 1	emilin1a	12.24	4.57828	5.43265e-33	9.76854e-31
82	Progenitors 1	rbpms2b	12.1726	1.65926	4.67006e-33	8.4522e-31
83	Progenitors 1	BX284638.1	12.1271	1.29287	8.63731e-33	1.50425e-30
84	Progenitors 1	slmapb	12.1208	1.79136	8.49121e-33	1.48817e-30
85	Progenitors 1	atp1b1a	12.0799	1.14828	1.47529e-32	2.5374e-30
86	Progenitors 1	zic2b	11.9919	1.1041	4.21693e-32	7.16387e-30
87	Progenitors 1	si:ch73-335l21.4	11.955	1.24698	5.97719e-32	1.00923e-29
88	Progenitors 1	nrp2b	11.8913	1.18237	1.327e-31	2.20035e-29
89	Progenitors 1	eml1	11.8819	1.89407	1.27836e-31	2.13248e-29
90	Progenitors 1	sb:cb81	11.8671	3.12781	2.25216e-31	3.66851e-29
91	Progenitors 1	rhbg	11.8514	2.23493	1.89092e-31	3.11675e-29
92	Progenitors 1	ccdc80	11.847	5.13631	4.74992e-31	7.5592e-29
93	Progenitors 1	cxcl14	11.8378	1.70818	2.09306e-31	3.42952e-29
94	Progenitors 1	crip3	11.8316	3.94764	4.14295e-31	6.66992e-29
95	Progenitors 1	CR848047.1	11.8163	1.90224	2.67423e-31	4.33052e-29
96	Progenitors 1	efhd1	11.8023	3.13079	4.37111e-31	6.99655e-29
97	Progenitors 1	bcar1	11.7913	3.94709	6.3481e-31	9.9878e-29
98	Progenitors 1	cited4a	11.7195	0.827467	1.20972e-30	1.87141e-28
99	Progenitors 1	eif4ebp3l	11.7086	1.78254	8.84668e-31	1.38403e-28

## Sheet: Progenitor 2
	group	names	scores	logfoldchanges	pvals	pvals_adj
100	Progenitors 2	insm1a	29.7429	4.06283	8.46516e-139	3.90681e-135
101	Progenitors 2	pou2f2a-1	25.1097	3.67982	1.14614e-107	2.11585e-104
102	Progenitors 2	rbpjb	22.319	2.4372	3.50345e-92	4.04225e-89
103	Progenitors 2	si:dkey-56m19.5	22.0918	1.84433	3.39648e-93	4.08922e-90
104	Progenitors 2	h3f3b.1	21.7455	1.01019	5.04031e-95	6.64625e-92
105	Progenitors 2	tubb2b	21.5681	1.212	6.26153e-94	7.88128e-91
106	Progenitors 2	stmn1a	21.357	1.33418	3.58426e-91	3.67599e-88
107	Progenitors 2	hmgb2a	21.2668	0.923674	1.40691e-91	1.49841e-88
108	Progenitors 2	im:7152348	20.8426	2.88006	3.98922e-81	3.06849e-78
109	Progenitors 2	tent5ba	20.0803	3.24729	2.50072e-75	1.6104e-72
110	Progenitors 2	mex3b	20.0719	2.23393	2.79876e-77	1.89026e-74
111	Progenitors 2	neurod4	19.8934	4.06852	1.63238e-73	1.0045e-70
112	Progenitors 2	stmn1b	19.6526	1.1952	2.20107e-78	1.64729e-75
113	Progenitors 2	sox11a	19.1295	1.84615	2.72664e-72	1.64138e-69
114	Progenitors 2	hes6	18.8414	1.76742	2.30607e-70	1.33036e-67
115	Progenitors 2	nusap1	18.2124	1.83968	4.70841e-67	2.54289e-64
116	Progenitors 2	golga7ba	18.1373	2.68429	3.2297e-64	1.65618e-61
117	Progenitors 2	mycla	17.7785	2.75713	6.22366e-62	2.92101e-59
118	Progenitors 2	ndrg1b	17.5824	4.81879	1.86932e-59	8.08801e-57
119	Progenitors 2	mki67	17.5777	1.18324	1.10911e-64	5.79481e-62
120	Progenitors 2	foxn4	17.3932	2.27131	2.42215e-60	1.09954e-57
121	Progenitors 2	cdkn1ca	17.2424	3.57255	5.75241e-58	2.37746e-55
122	Progenitors 2	itm2cb	17.067	1.81365	4.98517e-59	2.09158e-56
123	Progenitors 2	nsg2	17.0199	2.49287	8.77844e-58	3.57476e-55
124	Progenitors 2	chd7	16.5627	1.07434	3.52073e-57	1.41294e-54
125	Progenitors 2	cenpf	16.4936	1.50218	1.29889e-56	5.06584e-54
126	Progenitors 2	sox11b	16.2832	1.53594	8.72083e-55	3.35401e-52
127	Progenitors 2	hmga1a	15.7189	0.713749	7.69473e-53	2.87939e-50
128	Progenitors 2	top2a	15.6855	1.31487	6.31237e-52	2.33061e-49
129	Progenitors 2	atoh7	15.6349	3.63344	2.89926e-49	9.55756e-47
130	Progenitors 2	si:ch211-137a8.4	15.5575	0.957719	2.96779e-51	1.04027e-48
131	Progenitors 2	zswim5	15.5534	1.32071	1.9909e-50	6.72317e-48
132	Progenitors 2	tuba8l4	15.5111	0.796337	1.74522e-51	6.27622e-49
133	Progenitors 2	ccna2	15.4809	1.21825	1.13472e-50	3.92771e-48
134	Progenitors 2	ube2c	15.2556	1.48582	5.34633e-49	1.74171e-46
135	Progenitors 2	si:ch211-255i3.4	15.1992	1.9385	8.55982e-48	2.60472e-45
136	Progenitors 2	cdk1	15.1876	1.3556	7.57877e-49	2.41223e-46
137	Progenitors 2	histh1l	15.0166	1.24716	7.09422e-48	2.18273e-45
138	Progenitors 2	si:ch211-222l21.1	14.7123	0.667203	7.84107e-47	2.30986e-44
139	Progenitors 2	h3f3b.1-2	14.6872	0.852724	3.42016e-46	9.66404e-44
140	Progenitors 2	si:ch73-281n10.2	14.6319	0.750805	2.75614e-46	7.86807e-44
141	Progenitors 2	dhx32b	14.5024	1.76413	3.26629e-44	8.61399e-42
142	Progenitors 2	CABZ01058261.1	14.4962	1.20334	6.87521e-45	1.84836e-42
143	Progenitors 2	otx2b	14.4349	3.10824	6.70345e-43	1.6723e-40
144	Progenitors 2	tubb4b	14.4129	0.701844	6.07239e-45	1.64854e-42
145	Progenitors 2	onecut2	14.3852	3.55753	1.4241e-42	3.52096e-40
146	Progenitors 2	znrf1	14.3426	1.80095	2.61461e-43	6.70382e-41
147	Progenitors 2	tuba8l	14.2549	1.17044	1.19322e-43	3.11712e-41
148	Progenitors 2	tuba1a	14.2393	0.852048	1.27181e-43	3.29138e-41
149	Progenitors 2	tfap2d	14.0435	5.68883	1.91939e-40	4.42915e-38
150	Progenitors 2	pou2f2a	13.9333	3.18381	2.63507e-40	6.0304e-38
151	Progenitors 2	aurkb	13.9291	1.20152	8.88763e-42	2.15884e-39
152	Progenitors 2	alcamb	13.895	1.82748	6.67842e-41	1.56722e-38
153	Progenitors 2	lbr	13.813	0.898885	1.88563e-41	4.54042e-39
154	Progenitors 2	birc5a	13.661	1.53285	6.51056e-40	1.47774e-37
155	Progenitors 2	cnp	13.4852	1.0663	3.23183e-39	7.27582e-37
156	Progenitors 2	dek	13.3275	0.782037	7.34345e-39	1.62678e-36
157	Progenitors 2	h1f0	13.2019	1.04755	5.63048e-38	1.21808e-35
158	Progenitors 2	dclk1a	13.0932	1.69628	8.8059e-37	1.87572e-34
159	Progenitors 2	pif1	13.0104	2.4432	4.76173e-36	9.7672e-34
160	Progenitors 2	bhlhe22	12.9548	3.42146	2.10037e-35	4.12491e-33
161	Progenitors 2	tpx2	12.8377	1.25672	7.30345e-36	1.4762e-33
162	Progenitors 2	mad2l1	12.7563	1.14963	1.49887e-35	2.96465e-33
163	Progenitors 2	cited4b	12.7512	2.1458	6.66202e-35	1.29914e-32
164	Progenitors 2	tuba1c	12.7292	0.816479	1.25756e-35	2.50525e-33
165	Progenitors 2	cdc20	12.6968	1.61456	7.25345e-35	1.40458e-32
166	Progenitors 2	neurod1	12.6789	2.7263	3.05041e-34	5.70736e-32
167	Progenitors 2	tp53inp2	12.5753	1.10181	1.53174e-34	2.90516e-32
168	Progenitors 2	lepr	12.5688	1.28379	1.38189e-34	2.63902e-32
169	Progenitors 2	hmgn2	12.3784	0.51289	4.67702e-34	8.63408e-32
170	Progenitors 2	tsc22d1	12.3231	0.95009	2.2971e-33	4.18481e-31
171	Progenitors 2	cep55l	12.2654	1.51005	7.61454e-33	1.34302e-30
172	Progenitors 2	kifc1	12.2602	1.36743	6.82996e-33	1.22018e-30
173	Progenitors 2	srrm4	12.2442	1.46905	8.77266e-33	1.51827e-30
174	Progenitors 2	ncapg	12.2166	1.06696	7.59179e-33	1.34302e-30
175	Progenitors 2	rimkla	12.1079	1.12955	2.91664e-32	4.98547e-30
176	Progenitors 2	kif22	12.0442	1.29223	7.47145e-32	1.25389e-29
177	Progenitors 2	barhl2	11.8795	3.74717	2.3282e-30	3.54232e-28
178	Progenitors 2	tfap2c	11.8442	2.7132	2.10664e-30	3.23722e-28
179	Progenitors 2	dlgap5	11.8367	1.16619	5.63171e-31	8.91129e-29
180	Progenitors 2	robo3	11.8231	2.34776	2.11598e-30	3.23722e-28
181	Progenitors 2	cxxc5a	11.7887	1.03148	1.02851e-30	1.60003e-28
182	Progenitors 2	prdm1b	11.6407	3.05798	2.10197e-29	3.01584e-27
183	Progenitors 2	scml2	11.6365	2.17736	1.38222e-29	2.00394e-27
184	Progenitors 2	calm2b	11.6269	0.624698	2.66788e-30	4.03696e-28
185	Progenitors 2	si:dkey-28b4.8	11.6145	1.31239	8.66228e-30	1.27589e-27
186	Progenitors 2	si:ch211-69g19.2	11.5984	1.70673	1.28009e-29	1.86563e-27
187	Progenitors 2	arpp19b	11.5896	0.917289	6.80689e-30	1.01338e-27
188	Progenitors 2	anp32a	11.5877	0.658562	4.8666e-30	7.32397e-28
189	Progenitors 2	plcxd3	11.5553	2.7935	4.62065e-29	6.52808e-27
190	Progenitors 2	hmgb3a	11.35	0.783461	8.71015e-29	1.20596e-26
191	Progenitors 2	myt1a	11.3481	1.46211	1.46103e-28	2.01281e-26
192	Progenitors 2	pik3r3b	11.2848	1.71014	4.09422e-28	5.53039e-26
193	Progenitors 2	hes2.2	11.2402	1.97539	5.43891e-28	7.31111e-26
194	Progenitors 2	kif11	11.2186	1.49388	6.47166e-28	8.65733e-26
195	Progenitors 2	lrrfip1a	11.0295	2.59169	8.20892e-27	1.05238e-24
196	Progenitors 2	h2afva	11.0211	0.676323	2.31942e-27	3.05844e-25
197	Progenitors 2	plk1	10.9877	1.17864	4.87029e-27	6.36147e-25
198	Progenitors 2	si:ch211-207i1.2	10.9755	1.30173	5.84945e-27	7.56902e-25
199	Progenitors 2	kmt5ab	10.9209	1.76093	1.57864e-26	2.01447e-24
