# Supplementary material for: Single-cell RNA sequencing unravels the transcriptional network underlying zebrafish retina regeneration
Source: eLife. 2023 Nov 21;12:RP86507. doi: 10.7554/eLife.86507 (PMC10662954; doi:10.7554/eLife.86507)
Supplement: Supplementary file 7. [file elife-86507-supp7.xlsx]

## Sheet: Tabelle1
	Appendix: Sequenced-based reagents
	Designation	Source or reference	Identifiers	Additional information
	crlf1a	This paper	PCR primers	Fw_CTCACAAAACTCGCAACCAGG
	crlf1a	This paper	PCR primers	Rev_GGATCCATTAACCCTCACTAAAGGGAACGTGGCCACTTTTGAGTCCA
	id1	This paper	PCR primers	Fw_GGATATTTAGGTGACACTATAGAAGAGCATGTGGTGAACTGTCA
	id1	This paper	PCR primers	Rev_GGATTAATACGACTCACTATAGGG CACAAACACACACGCGTATC
	hmgb2b	This paper	PCR primers	Fw_GCAGACATGTCGCGATGAAC
	hmgb2b	This paper	PCR primers	Rev_TTAACTGAACCCGTCGGTCG
	onecut2	This paper	PCR primers	Fw_GGCTTGGGCTCCATACACAG
	onecut2	This paper	PCR primers	Rev_ACGCTTTGGTGCAAGTGCTG
	stm	Söllner et al., 2003	PCR primers	Fw_CGGAAAAGATGAAGCAGAGC
	stm	Söllner et al., 2003	PCR primers	Rev_CCGTCGTCACTTTTGTCAGA
	atoh7	This paper	Plasmids	CGCAATATGGCGGCCAATGCAAGAGAACGAAAGAGAATGCAAGGCCTGAACACGGCATTCGACCGGCTTCGGAAAGTGGTTCCACAGTGGGGTCAAGACAAGAAGCTGTCCAAATACGAGACCCTACAGATGGCTCTGAGCTACATCATGGCCCTCAATCGGATCCTGAGCGACGCTGGTAGACACGTGGATCCTCAGAAAGACTGGCTTAATTTACAGTTCGACGGCCTACAGACTGAGGGATATTTTATGCACTACGATTCACCTGTGGAAAGTGACTGCATGCTTTCTTCTTTCTCCTACCACTACGAAAGCCTCTGAAGTGACTGACTGATGGAGCATTTACTGTATCTTTCTTTATGTGGATACAGGAGGGTGTAAATATGTTTGTATTACTAT…
	onecut1	Matthews et al., 2004	Plasmids	CTCAGGCTTGGGTACCGAGCTCGGGATCCACTAGTAACGGCCGCCAGTGTGCTGGAATTCGCCCTTCGTAGAGCTGGCACACAGTCAGGAGAGCCGAGCCATGCTGCACTCTCGGGATCTCACGGCTGCCTTCCCTCGCCCCTCTTTGGGAGGCCCTGTCATGGGCCTGGAGTCTGACCACCAGAGCCCGACATATGACCACATGGCAACTCTGGGGTACAGCAGGGATGCACCAACTACCTGTGGAAGCACCTACACCACACTGACACCCCTCCAGCCATTTGATGACAAATTCCACCATCATCACCATCATCCCTGCCTGCCCGTCAGCAATGTCATCGGCAGCTTCACTCTCATGCGAGAGGATCGAAGTCTTGGAGGAAATTACTACACATCATA…
	her4.1	Takke et al., 1999	Plasmids	GCTCCCGCGGGTGGCGGCCGCTCTAGAACTAGTGGGATCCCCCGGGCTGCAGGAATTCCGTTGGTGTCGTTTTTTTTTTTTTTTTTTTTTTTTTTTTTTTTTGACATAAAATAAACTTTTATTATTTGTTATAAAACATTTGCAGATGTTGTCCATCTTCGTTTAGTGCTTTCCATTGTTGCTTGATTGTAAAACTTGTTTAAAACACAGCTACCCTGCAATATCATTATAATATTGCCTTACAATCTTTATAAAAGGATTTGTCAGTCATATTTGATTATATCAAATCTACCCCCCCAACTTAATAAAAATCCATTAAATCTGTTAAAAAACTTCTATTCATAAAACATAAATATGCACCTCAATGGGAGATATATAATTGTGAATGTATAAAATAAC…
